1        **$\beta$ -glucan dependent shuttling of conidia from neutrophils to**  
2       **macrophages occurs during fungal infection establishment**

3

4       Vahid Pazhakh<sup>1\*</sup>, Felix Ellett<sup>1,2,3,4\*</sup>, Joanne A. O'Donnell<sup>2,5</sup>, Luke Pase<sup>1,2</sup>,  
5       Keith E. Schulze<sup>6</sup>, R. Stefan Greulich<sup>1,7</sup>, Constantino Carlos Reyes-Aldasoro<sup>8</sup>,  
6       Ben A. Croker<sup>2,9</sup>, Alex Andrianopoulos<sup>10</sup>, Graham J. Lieschke<sup>1,2</sup>

7

- 8       1. Australian Regenerative Medicine Institute, Monash University, Clayton,  
9       Victoria 3800, Australia.  
10      2. Cancer and Haematology Division, Walter and Eliza Hall Institute of Medical  
11      Research, Parkville, Victoria 3052, Australia.  
12      3. Department of Medical Biology, University of Melbourne, Parkville, Victoria  
13      3010, Australia.  
14      4. Current address: BioMEMS Resource Center, Massachusetts General  
15      Hospital/Harvard Medical School, Charlestown, Massachusetts 02129, USA.  
16      5. Current address: Anatomy and Developmental Biology, Monash University,  
17      Clayton, Victoria 3800, Australia.  
18      6. Monash Micro Imaging, Monash University, Clayton, Victoria 3800, Australia.  
19      7. Current address: Neurobiology Laboratory, Deutsches Primatenzentrum  
20      GmbH, Göttingen, Germany.  
21      8. School of Mathematics, Computer Science and Engineering, City University  
22      of London, London EC1V OHB, UK.  
23      9. Boston Children's Hospital, Harvard Medical School, Boston, MA 02115  
24      USA.  
25      10. Genetics, Genomics and Systems Biology, School of BioSciences, University  
26      of Melbourne, Victoria 3010, Australia.

27

28      \* These authors contributed equally

29

30      **Corresponding author:**

31           Prof Graham J. Lieschke  
32           Australian Regenerative Medicine Institute  
33           15 Innovation Walk  
34           Monash University, Clayton, Victoria 3800, Australia  
35           Email: [Graham.Lieschke@monash.edu](mailto:Graham.Lieschke@monash.edu)  
36           Telephone: +61 (3) 9902 9720  
37           Fax: +61 (3) 9902 9729

38

39      **Short title:** Fungal spore shuttling between phagocytes

40 **Abstract**

41 The initial host response to fungal pathogen invasion is critical to infection  
42 establishment and outcome. However, the diversity of leukocyte-pathogen  
43 interactions is only recently being appreciated. We describe a new form of inter-  
44 leukocyte conidial exchange called “shuttling”. In *Talaromyces marneffe* and  
45 *Aspergillus fumigatus* zebrafish *in vivo* infections, live imaging demonstrated  
46 conidia initially phagocytosed by neutrophils were transferred to macrophages.  
47 Shuttling is unidirectional, not a chance event, involves alterations of phagocyte  
48 mobility, inter-cellular tethering, and phagosome transfer. Shuttling kinetics  
49 were fungal species-specific, implicating a fungal determinant.  $\beta$ -glucan serves as  
50 a fungal-derived signal sufficient for shuttling. Murine phagocytes also shuttled  
51 *in vitro*. The impact of shuttling for microbiological outcomes of *in vivo* infections  
52 is difficult to specifically assess experimentally, but for these two pathogens,  
53 shuttling augments initial conidial redistribution away from fungicidal  
54 neutrophils into the favourable macrophage intracellular niche. Shuttling is a  
55 frequent host/pathogen interaction contributing to fungal infection  
56 establishment patterns.

57

58

59 150 words / 150 words allowed

60

61

## 62 **Introduction**

63 In vertebrates, two phagocytic cell types have long been recognized as key  
64 players in the initial host defense response to infection: neutrophil granulocytes  
65 and macrophages [1]. Neutrophils and macrophages share many features: they  
66 are both migratory cells, they phagocytose microorganisms on encountering  
67 them, and they have intracellular mechanisms for killing microorganisms.  
68 However, although both phagocyte types engulf microorganisms, individual  
69 microorganisms interact with neutrophils and macrophages with different  
70 species-specific preferences, in different ways, and using different molecular  
71 mechanisms [2]. Conversely, the host has evolved diverse cellular strategies for  
72 these two different phagocytes to protect against the panoply of potentially  
73 pathogenic microorganisms.

74

75 The exchange of cytoplasmic material through contact-dependent mechanisms  
76 between adjacent cells is currently a topical field in cell biology. An example is  
77 the contact-dependent exchange of cytoplasm from macrophage to tumor cells as  
78 a metastasis-promoting mechanism [3], distinct from the cytoplasmic exchange  
79 between macrophages and tumor cells that occur via extracellular vesicles and  
80 nanotubes [4-6].

81

82 During infections, neutrophils and macrophages also engage in intercellular  
83 exchanges. Some microorganisms have evolved mechanisms that exploit these to  
84 enhance their pathogenicity and promote their spread between phagocytes. For  
85 example, *Yersinia pestis* and *Leishmania* promastigotes induce apoptosis in host  
86 neutrophils to then exploit efferocytosis, whereby clearance of dead neutrophils

87 by macrophages leads to subsequent infection of this less hostile host cell [7-9].  
88 Conversely, neutrophil phagocytosis of debris from dying macrophages is a  
89 recently-demonstrated method of mycobacterial dissemination [10]. *Candida*  
90 *albicans* [11] and *Cryptococcus neoformans* [12] can be ejected from host  
91 macrophages by non-lytic exocytosis, while macrophage-resident *C. neoformans*  
92 [13] and *Aspergillus fumigatus* [14] also can enter new host macrophages  
93 through lateral transfer (recently termed metaforosis [15]). The Gram negative  
94 bacteria *Francisella tularensi* and *Salmonella enterica* are transferred between  
95 macrophages by a process related to trogocytosis [16]. These scenarios are  
96 characterised either by death of the donor cell, expulsion of the pathogen from  
97 the donor cell without direct contact between donor and recipient phagocyte, or  
98 transfer between the same type of phagocyte. None involves transfer by direct  
99 contact from a living neutrophil to living macrophage.

100

101 Such interactions provide an opportunity for intracellular pathogens to transfer  
102 to a new host cell, while minimising exposure to a potentially hostile  
103 extracellular environment. As antibiotic resistance becomes a growing problem,  
104 there is an ever-increasing interest in host-pathway directed anti-infective  
105 therapies. Host dependent processes for pathogen dissemination represent key  
106 potential targets [17].

107

108 Zebrafish have emerged as an ideal model for intravital imaging of leukocyte  
109 behaviors during infection [18]. They combine the advantages of small size,  
110 optical transparency (particularly as embryos and larvae) and suitability for

111 genetic manipulation. Zebrafish phagocytes have been comprehensively  
112 characterized in developmental, genetic and functional studies [19].

113

114 Our recent modeling of fungal infections in zebrafish models have focused on  
115 high spatiotemporal resolution intravital imaging of the initial leukocyte-  
116 pathogen interactions [20]. During these studies, we observed a form of  
117 microorganism exchange between neutrophils and macrophages that we believe  
118 to be previously undescribed, which we have named “shuttling”. In shuttling, a  
119 living donor neutrophil laden with previously-phagocytosed fungal spore(s)  
120 transfers this cargo to a recipient macrophage through a tethered direct contact,  
121 without death of the donor neutrophil. Shuttling is therefore different to all the  
122 previously described microorganism exchanges between phagocytes.

123

124 In the present study, we comprehensively describe neutrophil-to-macrophage  
125 “shuttling”. Studying shuttles presented considerable technical challenges, as  
126 they could only be identified by directly observing them retrospectively in *in vivo*  
127 live imaging datasets. To recognize a shuttle, all three phases of the process had  
128 to be captured in the imaged volume: initial carriage of a phagocytosed spore  
129 within a mobile, living donor neutrophil; the moment of intercellular contact and  
130 transfer between neutrophil and macrophage; and the departure of the  
131 previously unladen recipient macrophage, now carrying its newly acquired  
132 cargo. All three shuttle-defining steps needed to have occurred within the  
133 imaged volume, despite the high mobility of the participating cells. Despite this  
134 challenge, we comprehensively describe the morphology of shuttling, quantify  
135 key parameters of the dynamic transfer process, and identify a key mechanistic

136 determinant by demonstrating that the conidial cell wall component  $\beta$ -glucan is a  
137 fungal-derived molecular signal sufficient to trigger shuttling of particles.  
138 Additionally, by replicating this phenomenon using murine phagocytes *in vitro*,  
139 we provide evidence that shuttling is a conserved behavior of both fish and  
140 mammalian phagocytes.

## 142 **Results**

### 143 **Some *Talaromyces marneffe* conidia phagocytosed by neutrophils are** 144 **“shuttled” to macrophages.**

145 While studying leukocyte behavior during the establishment of *Talaromyces*  
146 *marneffe* infection following inoculation of live conidia into zebrafish [20], we  
147 unexpectedly observed the recurrent direct transfer of conidia from live  
148 neutrophils to adjacent live macrophages (Fig 1, Supplementary Movie S1a,b).  
149 The phenomenon was revealed by combining a 3-color fluorescent reporter  
150 system (labelling neutrophils in green [EGFP], macrophages in red [mCherry],  
151 conidia in blue [calcofluor]) with high spatiotemporal resolution live confocal  
152 imaging. We called this new form of inter-phagocyte pathogen transfer  
153 “shuttling”. Two defining features of shuttling distinguished it from other  
154 previously-described forms of pathogen transfer. Firstly, shuttling occurred  
155 between live leukocytes, demonstrated by the mobility of both donor neutrophil  
156 and recipient macrophage before, during and after shuttles. Secondly, the  
157 dynamic morphology of shuttling suggested purposeful rather than random  
158 exchange, through a tethered cell-to-cell contact.

159

160 To characterize the dynamic morphology of shuttling comprehensively, we  
161 systematically collected multiple unselected examples from extensive confocal  
162 live-imaging microscopy experiments. To ensure that shuttles were  
163 unequivocally distinguished from all other modes of intercellular pathogen  
164 transfer, stringent criteria were applied for events to be included in this initial  
165 panel. For inclusion as a shuttle, all three phases of donation, transfer and receipt

166 were required to be unequivocally visualized (see Materials and Methods for full  
167 details). The resulting collection of unequivocal shuttles comprised 13 examples  
168 of live *T. marneffe*i conidial shuttling (Fig S1, Supplementary Figure S1), and as  
169 shuttling mechanisms were explored, another 17 unequivocal examples of  
170 conidial shuttling and 18 examples of the shuttling of other particles meeting all  
171 stringent definition criteria were collected (Supplementary Table S1).

172

173 Shuttling of live *T. marneffe*i conidia occurred only in the first two hours of  
174 infection establishment (median time of shuttle, 33 min [range 14-97] from  
175 commencement of imaging; n=13 shuttles collected in 69 movies; Supplementary  
176 Fig S1A). In contrast, no *T. marneffe*i shuttles occurred during >181 hr of imaging  
177 after 2 hr post inoculation.

178

179 These *T. marneffe*i shuttling examples exhibited morphological features with  
180 mechanistic implications. In several cases, the donor neutrophil and/or recipient  
181 macrophage formed a highly polarised shape resulting from cell-to-cell tethering  
182 around the time of shuttling (Fig 1E,F, Fig 2A, Supplementary Movie S1b-d).

183 These drawn-out tethered extensions of neutrophil and macrophage cytoplasm  
184 before, during or after shuttling indicated a focal rather than a whole-of cell  
185 “hugging” interaction between them. Furthermore, this tethering confirms that  
186 the cells come into direct physical contact for the shuttle, rather than merely  
187 moving into close proximity and transferring the conidium by expulsion into the  
188 extracellular space and re-phagocytosis.

189



190 Although single conidia were usually shuttled ([Fig 1, Supplementary Table S1](#)),  
191 occasionally more than one conidium was transferred (2/13 instances; [Fig 2B,C,](#)  
192 [Supplementary Movie S1e-f](#)). One example of this was in quick succession ([Fig](#)  
193 [2B, Supplementary Movie S1e](#)). However, the non-synchronous transfer of two  
194 shuttled conidia in series from the same donor neutrophil in another example  
195 ([Fig 2C, Supplementary Movie S1f](#)) indicated that the signalling mechanism  
196 driving each shuttle could operate independently.

197

198 **Shuttling also occurs with *Aspergillus fumigatus* conidia.**

199 To test whether conidial shuttling was specific to *T. marneffe* or a general  
200 phenomenon of fungal infection establishment, we assayed for shuttling  
201 following inoculation with live *Aspergillus fumigatus* conidia, another fungus  
202 whose interactions with leukocytes are well studied in zebrafish models [20-23],  
203 but for which shuttling has not previously been described. Seven unequivocal  
204 shuttles of live *A. fumigatus* conidia occurred in 6/22 imaging sequences ([Fig 2D-](#)  
205 [F, Supplementary Fig S1B, Supplementary Movie S2](#)). The median time of  
206 shuttling was 121 [range 30-199] min following commencement of imaging. *A.*  
207 *fumigatus* shuttles exhibited similar features to *T. marneffe* shuttles, including  
208 cell-to-cell tethering ([Supplementary Movie S2d](#)). In 1/7 example, two shuttles  
209 occurred in the same imaged volume between different donor neutrophils and  
210 macrophages, separated by an interval of 10 minutes ([Fig 2F](#)).

211

212 To exclude the possibility that shuttling was an artefact of labelling conidia with  
213 calcofluor, we tested conidia with an alternate label. *A. fumigatus* conidia labelled  
214 with Alexa Fluor® 405 were also shuttled ([Fig 2E, Supplementary Movie 2c](#)). All

215 shuttles occurred from donor neutrophil to recipient macrophage. No  
216 macrophage-to-neutrophil shuttles were observed despite looking carefully for  
217 them.

218

219 Collectively, these observations establish that shuttling is a recurrent form of  
220 unidirectional pathogen transfer from neutrophils to macrophages that occurs  
221 early in fungal infection establishment. It is not a peculiarity of the host response  
222 to a particular fungal pathogen, because it occurs with two fungal species.

223

#### 224 **Incidence of shuttling.**

225 Shuttling events meeting our stringent criteria were observed in 20/91 (22%)  
226 unselected imaging sequences of >60 min duration ([Supplementary Fig S1](#)).  
227 While this ascertainment rate provided a scorable surrogate categorical variable  
228 for shuttling incidence, a more biologically-relevant measure of the incidence of  
229 shuttling would add weight to its biological significance.

230

231 One such biologically-relevant quantification is the shuttling incidence per  
232 condium *at risk of shuttling*. This measure, regardless of any macrophage  
233 phagocytic activity and recruitment of non-phagocytosing leukocytes, is  
234 denominated solely by the number of spore-laden neutrophils in the imaged  
235 volume available to act as donors. While this is impossible to determine exactly  
236 for any single image series due to neutrophil flux through the imaged volume, it  
237 is possible to compute an averaged estimate. For both these fungi, we have  
238 previously examined phagocytosis during infection establishment and previously  
239 reported that macrophage phagocytosis predominates over neutrophil

240 phagocytosis in the first three hours following inoculation [20]. These  
241 phagocytosis data resulted from analysis of a subset of imaging files of the  
242 current dataset, and so provide a basis for estimating an averaged shuttling  
243 incidence based on averaged spore-laden neutrophil phagocytosis rates. For *T.*  
244 *marneffeii*, an average of 1.34 conidial-loaded neutrophils (67 neutrophils at 50  
245 time points) were present at any time in the imaged volume to be available as  
246 donors throughout the first 180 minutes after inoculation (derived from n=10  
247 imaging series, being those 10 series closest to 180 min in length). Hence 13  
248 shuttles in 69 imaging series means that on average, 14% of spores available in  
249 neutrophils for donation were shuttled in 3 hours. Also of note is the fact that  
250 5/10 imaging series had only  $\leq 1$  spore-laden neutrophil present in the imaged  
251 volume during the first 180 minutes, hence these imaging series provided little  
252 opportunity for shuttling to occur. For *A. fumigatus*, neutrophil phagocytosis of  
253 conidia was much rarer, as also observed by others [20,24]. An analogous  
254 averaged calculation gives an average incidence of 44% for shuttling of *A.*  
255 *fumigatus* spores that were available for donation by loaded neutrophils in the 3  
256 hours after inoculation (36 neutrophils / 50 time points = 0.72 spore-laden  
257 neutrophils on average at any time point over three hours; 7 shuttles in 22  
258 movies).

259

260 Calculating the real shuttle incidence is challenging and these rates are certainly  
261 underestimates. The rate depends on the sensitivity of ascertainment, which is  
262 constrained by the limitations of the detection method and our stringent  
263 definition of shuttling. These two factors together conspire to underestimate  
264 shuttle incidence.

265

266 Challenges in shuttle detection that contributed to underestimating incidence  
267 included: (1) shuttles can currently only be recognised by the laborious method  
268 of manually observing them in retrospective analysis of imaging datasets; (2) at  
269 the magnification required for the sub-cellular resolution needed to see shuttles,  
270 the imaged volume is only a small fraction of the infected volume; and (3) the  
271 leukocytes involved are highly mobile and frequently move out of the imaged  
272 volume, hence the denominators for computing incidence are constantly  
273 changing.

274

275 Several other observations indicate that shuttles are not rare. If shuttles were  
276 rare, it would be unlikely that multiple examples would occur together or in the  
277 same imaging sequence. However, 5/20 datasets contained examples of multiple  
278 shuttles, either 2-3 spores being shuttled together, or in quick succession, or  
279 asynchronously from the same or several different donor neutrophils ([Fig 2B,C,F](#),  
280 [Supplementary Movies S1e,f, S2e; Fig 3, Supplementary Movies 2f, 3a-c](#)).

281

282 The stringent criteria applied to ensure only unequivocal shuttles were included  
283 also means that the shuttle incidence is likely to be underestimated. Multiple  
284 events that were probably shuttles were excluded from this initial panel of  
285 unequivocal shuttles (see examples in [Supplementary Figure S2, Supplementary](#)  
286 [Movie S4](#)). There were probable shuttles where the conidium could not  
287 unequivocally be resolved as within the donor neutrophil rather than adherent  
288 to it ([Supplementary Figure S2A, Supplementary Movie S4a](#)). The criterion most  
289 often not met was clear visualisation of the donor-recipient cell-to-cell contact at

290 the point of conidial transfer ([Supplementary Figure S2C-D](#), [Supplementary](#)  
291 [Movie S4c-d](#)). This scenario included instances where a phagocytosed particle  
292 appeared to be deposited by the neutrophil into extracellular space and was then  
293 subsequently taken up by a macrophage. In some imaged volumes, a large  
294 number of highly active neutrophils and macrophages were attracted to the  
295 inoculated spores, and it was impossible to separate what happening although  
296 initially many spores were in neutrophils that ended up in macrophages  
297 ([Supplementary Figure S2D](#), [Supplementary Movie S4d](#)). These imaging series  
298 have been included in the denominator of our unselected series.

299

300 From these data and considerations, we conclude that although the detection of  
301 shuttling is laborious and challenging, shuttling itself is not a rare phenomenon.  
302 For both these fungal pathogens, those spores that are initially phagocytosed by  
303 neutrophils have a substantial chance of being shuttled to macrophages in the  
304 first 3 hours of infection establishment.

305

### 306 **Shuttling involves phagosome transfer.**

307 We previously reported the transfer of neutrophil cytoplasm to macrophages in  
308 the context of inflammation [25]. We therefore hypothesised that shuttling could  
309 also involve transfer of donor neutrophil cytoplasmic components to the  
310 recipient macrophage. To test specifically whether neutrophil membrane was  
311 also transferred, we imaged shuttling in *Tg(mpeg1:mCherry-CaaX/mpx:EGFP-*  
312 *CaaX)* embryos, in which the fluorescent labelling of neutrophils and  
313 macrophages is localised to the membrane via a prenylation motif ([Fig 3](#),  
314 [Supplementary Movie S3](#)). Cross-sectional fluorescence intensity profiling of

315 conidia in these transgenic lines demonstrated that prior to shuttling, about-to-  
316 be shuttled conidia reside within membrane-bound compartments within the  
317 neutrophil (Fig 3B). Observation of shuttled conidia in macrophages  
318 immediately following transfer demonstrated that green fluorescent signal  
319 surrounding the spore attributable to neutrophil membrane was also transferred  
320 to the macrophage (Fig 3C).

321

322 This provides direct evidence that shuttled conidia are located in a membrane-  
323 lined sub-cellular neutrophil compartment, likely to be a neutrophil phagosome,  
324 which is shuttled in its entirety to the recipient macrophage. The rapid decay of  
325 the cytoplasmic neutrophil reporter fluorophore signal following shuttling  
326 suggests that within the macrophage it is either quenched due to pH change, or  
327 that the structure of the shuttled phagosome and its component proteins are  
328 rapidly destroyed by the macrophage.

329

### 330 **Phagocyte motility confirms that living cells participate in shuttling.**

331 Our previous studies demonstrated that phagocytes exhibit lineage and site-  
332 specific spatiotemporal responses during establishment of fungal infection [20].  
333 We asked whether shuttling occurred “on the fly” between fast moving cells, or if  
334 cells slowed down and “parked” to engage in this intercellular interaction.

335

336 We first focussed on the scenario in which *T. marneffeii* conidia were delivered  
337 into the somite. To characterize the overall picture of leukocyte movement in  
338 which shuttling occurred, we used four-dimensional cell tracking in Imaris  
339 software (Bitplane) to extract and plot cell coordinates in time and space. We

340 interrogated these data using the open source programming language R (Fig 4A),  
341 as has been used to analyse leukocyte swarming [26]. In this scenario,  
342 neutrophils started to migrate towards the infection site soon after inoculation  
343 with conidia, while macrophage migration initiated later, during the second hour  
344 post infection. Overall, neutrophils exhibited more rapid motility than  
345 macrophages at all times and in all directions ( $P < 0.0001$ ). Phagocytosis of  
346 conidia upon arrival at the site of infection was associated with a reduction in  
347 migration velocity for both neutrophils and macrophages (Fig 4A).

348

349 To focus on the subset of phagocytes engaging in shuttling within this melee of  
350 phagocyte activity, we developed “ShuttleFinder”, a Matlab® program based on  
351 “PhagoSight” [27] that performs spatiotemporal tracking of conidia and reports  
352 the colour of their immediate surrounding environment (Fig 4B). ShuttleFinder  
353 did not facilitate automatic shuttle discovery due to the high number of  
354 disjointed tracks and a high number of false positives. However, it enabled the  
355 paths of conidia that were shuttled to be displayed in 2-dimensional space and  
356 time (Fig 4Bi) and 3-dimensional space (Fig 4Bii). This demonstration of conidial  
357 translocation showed the extent to which the donor neutrophils and recipient  
358 macrophages in which shuttled spores resided were mobile prior to and  
359 following the shuttle (Fig 4B,C).

360

361 We next assessed if cell velocity changed during shuttling manually examining  
362 the displacement of neutrophils and macrophages over fixed periods (5 and 10  
363 minutes) before and after shuttles. This analysis revealed that in the 10 minutes  
364 prior to shuttling, the displacement of a donor neutrophil from the shuttle

365 location was  $<15\ \mu\text{m}$  (i.e.  $< 2$  cell diameters), whereas after shuttling, neutrophil  
366 displacement significantly increased, indicating neutrophil velocity was  
367 significantly faster after shuttling than before it. This occurred for both *T.*  
368 *marneffe* and *A. fumigatus* shuttles (Fig 4C). The higher velocity of neutrophils  
369 after shuttling strongly indicates that the donor neutrophil was alive.

370

371 Macrophages also moved toward the shuttle point, their displacement altering  
372 significantly only in the case of *T. marneffe* shuttles. Macrophage displacement  
373 did not alter significantly in the 10 minutes after receiving a shuttled spore (Fig  
374 4C). However, over longer periods of time, the recipient macrophages were also  
375 mobile (Fig 4B), confirming their viability and indicating that receiving a donated  
376 spore is accompanied by only a temporary reduction in migratory activity.

377

378 The 20 shuttles of live spores meeting all stringent definition criteria (Fig 5A)  
379 suggested that shuttling continues the process of conidial dissemination. In  
380 16/20 cases the donor neutrophil entered the field during the imaging period,  
381 and hence it had picked up its spore for donation elsewhere. Furthermore, in  
382 18/20 cases, the recipient macrophage separated from the donor neutrophil  
383 before the image sequence finished (Fig 5A).

384

385 In summary, these data show that living neutrophils slow down to donate  
386 conidia for shuttling, that the living recipient macrophages are relatively  
387 stationary at the time of transfer and temporarily parked following receipt of a  
388 shuttled spore, and that shuttling contributes to the ongoing process of spore  
389 dissemination during infection establishment.



390

391 **Shuttling is a purposeful interaction that involves sustained intercellular**  
392 **communication.**

393 We considered the possibility shuttling might be a chance event rather than  
394 purposeful interaction. If shuttling occurred by chance alone, then the number of  
395 shuttles would be expected to be a function of the number of conidia delivered.  
396 However, shuttles occurred in fields that had initially as few as <4 conidia, and as  
397 many as 75-100 conidia, for both fungal species, and we could not resolve a  
398 trend based on the number of conidia initially in the imaged volume ([Fig 5B,C](#)).

399

400 We also hypothesized that if shuttling were purposeful rather than a random  
401 event, then this would be reflected by purposeful intercellular interactions.  
402 Shuttling is characterized by multiple polarized interactions between the donor  
403 neutrophil and the recipient macrophage prior to the shuttle, indicating  
404 sustained and purposeful prior cell-cell communication ([Supplementary Movies](#)  
405 [S1-3](#)). To quantitatively test the hypothesis that the degree of intercellular  
406 interaction between shuttling leukocytes was unusually extensive, we compared  
407 the duration neutrophil/macrophage contacts that ended with a shuttle to  
408 randomly selected non-shuttling contacts. This analysis revealed that shuttling  
409 cells stay in contact for a significantly longer period prior to shuttling than is  
410 otherwise the case for random neutrophil/macrophage interactions ( $P < 0.0001$ )  
411 ([Fig 5D](#)). This observation is consistent with there being signals bringing the  
412 donor and recipient cells together prior to shuttling. Furthermore, it indicates  
413 that these signals are different from those that attracted the leukocytes to  
414 migrate to the site of infection.

415

416 **Pathogen-dependent shuttling kinetics indicate a conidial determinant.**

417 We hypothesised that the molecular mechanism driving shuttling likely involved  
418 fungal determinants. If this were the case, this might result in different kinetics  
419 for the shuttling of conidia of different fungal species. Although we observed no  
420 obvious morphological difference between shuttles of *T. marneffeï* and *A.*  
421 *fumigatus* conidia (suggesting that the mechanism driving shuttling is  
422 fundamentally the same for both), the kinetics of shuttling events differed for the  
423 two species. *T. marneffeï* shuttles occurred predominantly in the first hour after  
424 inoculation, whereas *A. fumigatus* shuttles happened at later time points  
425 ( $p=0.016$ ) (Fig 5E). There was no ascertainment bias for shuttles of one or other  
426 fungus, as the two movie datasets shared a similar distribution of imaging  
427 durations (Supplementary Fig S1).

428

429 This important observation indicates that although shuttling is a general  
430 phenomenon in fungal infection establishment, because the kinetics of shuttling  
431 is specific to the fungal species, determinants of the molecular mechanism reside  
432 in properties of the conidia themselves.

433

434 **The fungal determinant of shuttling is not a metabolic product.**

435 A fungal determinant of shuttling could be either a chemical constituent of the  
436 conidium, or a newly-synthesized metabolite of the germinating fungi. To  
437 distinguish between these possibilities, we microinjected conidia inactivated by  
438 either freezing (*T. marneffeï*) or  $\gamma$ -irradiation (*A. fumigatus*) and imaged for  
439 shuttling events. We observed multiple shuttles of inactivated fungal conidia

440 (Figs 3,6A; Supplementary Movie S3), confirming that shuttling was stimulated  
441 by non-temperature-labile components of the conidial cell wall, rather than an  
442 actively synthesized signal.

443

444  **$\beta$ -glucan is a fungal determinant sufficient for shuttling.**

445 Because shuttling was independent of conidial metabolic activity, we  
446 hypothesized that the spore-derived signal for shuttling was either from the  
447 shape or size of the particle, or was a chemical component of the fungal cell wall  
448 such as chitin or  $\beta$ -glucan.

449

450 To test whether particle size was sufficient to trigger shuttling, we microinjected  
451 1.7-2.2  $\mu$ m fluorescent particles (approximating the size of *T. marneffe* and *A.*  
452 *fumigatus* conidia) into the tail somite of 2-3 dpf zebrafish embryos. Although the  
453 beads were actively phagocytosed by both neutrophils and macrophages, no  
454 shuttling events were observed (~60 hours of imaging, 19 experiments) (Fig 6B).

455 During these experiments, we frequently observed efferocytosis of entire bead-  
456 laden neutrophils by macrophages (Supplementary Figure S3, Supplementary  
457 Movie S5b). While the neutrophil EGFP fluorescent signal was rapidly lost  
458 following engulfment, the bead-conjugated fluorophore signal persisted. These  
459 experiments determined that being a particle of a particular size was not  
460 sufficient to induce shuttling, and that leukocyte phagocytic behaviour towards  
461 inert beads was demonstrably different to their response to fungal conidia. This  
462 indicates that shuttling is a conidia-specific behaviour, driven by a chemical  
463 signal residing within the conidium itself.

464

465 The cell wall of fungal conidia is primarily composed of polysaccharides (chitin  
466 and glucans) and proteins [28]. The  $\beta$ -glucan class of polysaccharides are a major  
467 component of the conidial wall and are highly immunogenic, so represented a  
468 promising candidate shuttling mediator. To test whether  $\beta$ -glucan was sufficient  
469 to induce shuttling, we first looked for shuttling of zymosan particles. Zymosan  
470 particles are approximately 3  $\mu\text{m}$  in diameter and are a derivative of the  
471 *Saccharomyces cerevisiae* cell wall, a rich source of  $\beta$ -glucan glucose polymers.  
472 We observed 3 unequivocal shuttles from ~30 hours of imaging over 6  
473 experiments (Fig 6A,C). Because zymosan is predominantly  $\beta$ -glucan, these data  
474 suggested that  $\beta$ -glucan may be a spore-derived signal sufficient for shuttling.

475

476 To more rigorously test the ability of  $\beta$ -glucan itself to trigger shuttling, we  
477 tested whether coating plastic beads in  $\beta$ -glucan conferred on them the ability to  
478 be shuttled. While uncoated beads were not shuttled (0 shuttles in 19  
479 experiments), beads coated with  $\beta$ -glucan were shuttled at relatively high  
480 frequency (10 shuttles during 22 experiments) (Fig 6B,D). Furthermore, treating  
481  $\beta$ -glucan-coated beads with a mixture of  $\beta$ -glucanase enzymes (including  
482 endo/exo-1,3- $\beta$ -D-glucanase and  $\beta$ -glucosidase) significantly reduced the rate of  
483 shuttle ascertainment, from 10 shuttles in 22 experiments to 3 shuttles over 24  
484 experiments (Fig 6B).

485

486 As a genetic model, we also tested  $\Delta\text{gel1}\Delta\text{gel7}\Delta\text{cwh41}$  *A. fumigatus* spores, which  
487 are deficient in their cell wall  $\beta$ -glucan content due to mutation of their  $\beta$ -1,3-  
488 glucanosyltransferase (*gel*) genes (62.6% and 42% of wild type at 37°C, and  
489 50°C, respectively) [29]. The shuttle ascertainment rate for conidia from the

490 mutant strain trended lower compared to wild type *A. fumigatus* (27.3% in  
491 wildtype vs. 14.8% in mutant) but this difference was not statistically significant  
492 (Fig 6A), likely because the ~50% remaining  $\beta$ -glucan on the conidial cell wall  
493 remained sufficient to trigger shuttling.

494

495 Collectively, these data support the hypothesis that  $\beta$ -glucan is a fungal wall  
496 derived molecule that is sufficient to trigger shuttling signals.

497

498 **Shuttling also occurs between mammalian neutrophils and macrophages.**

499 Our studies in zebrafish revealed that shuttling was a conserved host response to  
500 different species of fungi. We hypothesized that this behaviour might also be  
501 conserved between phagocytes from different host species, including higher  
502 vertebrates such as mammals.

503

504 We tested this hypothesis using an *in vitro* assay. Primary mouse bone marrow  
505 neutrophils were preloaded with Alexa Fluor® 488-labelled zymosan added to  
506 mouse bone marrow derived macrophages, and imaged over time. The transfer  
507 of zymosan particles from living neutrophils to macrophages was observed, in a  
508 similar fashion to that observed in the zebrafish *in vivo* model. (Fig 7A,B).

509

510 These data indicate that shuttling is a conserved behaviour of phagocytes in  
511 vertebrates from zebrafish to higher mammalian models, and is relevant to host-  
512 pathogen interactions during establishment of fungal infections in mammals.

513

## 514 **Discussion**

515 We previously reported the exchange of cytoplasmic fragments from living  
516 neutrophils to macrophages during a wound-stimulated inflammatory response  
517 [25], although the physiological purpose of this process was unknown. The data  
518 presented here reveals that one purpose of cytoplasmic exchange between  
519 neutrophils and macrophages is the transfer of phagocytosed microorganisms. It  
520 is readily assumed that when a conidium is found within a particular phagocyte  
521 during early infection establishment, then it was that particular phagocyte that  
522 first phagocytosed it. That is not the case. Conidial shuttling from living  
523 neutrophils to macrophages early in fungal infection is an additional and  
524 significant aspect of the cell biology of the initial host-pathogen interaction *in*  
525 *vivo*.

526

527 Shuttles could only be identified by careful retrospective analysis of live *in vivo*  
528 imaging files, which presented a substantial challenge to recognizing them and  
529 studying them and their mechanism. From the 188 independent imaging  
530 experiments in this report, in total we identified 48 stringently-defined conidial  
531 shuttles. Using shuttling ascertainment rates as a surrogate for shuttling  
532 incidence was sufficient for comparing conditions when exploring shuttling  
533 mechanisms. For example, we observed an overall ascertainment rate of 21.4%  
534 (30/140 datasets) for biologic particles (live or dead fungal spores and zymosan  
535 particles), compared to 45.5% (10/22) for  $\beta$ -glucan coated beads. From a more  
536 biological perspective, for *in vivo* infections following the delivery of 50-100  
537 conidia/inoculum (of which only a minority are initial phagocytosed by

538 neutrophils), the averaged shuttling incidence was at least 19.9% of neutrophil-  
539 located spores in the first 3 hr of infection. Shuttling was also sufficiently  
540 common for multiple occurrences to be recognized in some movies. Collectively,  
541 these observations indicate that shuttling is a consistent, recurring phenomenon  
542 during infection establishment, and hence has potential to impact the outcome of  
543 the host-pathogen interaction.

544

545 To differentiate shuttling from other mechanisms of pathogen entry into  
546 macrophages (such as direct phagocytosis, efferocytosis [9], metaforosis/lateral  
547 transfer [15], and trogocytosis [16]) it was critical to observe both the cellular  
548 origin of shuttled conidium and the moment of transfer. The only possible way to  
549 do this was to perform high-resolution 4D confocal microscopy with both high  
550 spatial and temporal resolution. Our *in vivo* zebrafish model provided  
551 fluorescent labelling clearly distinguishing the two phagocyte lineages, and  
552 imaging conditions were optimised for low phototoxicity. While this enabled  
553 high spatiotemporal resolution imaging for multiple hours, the imaging volumes  
554 often contained considerable biological complexity (high cell densities, cells  
555 entering/leaving imaging volume etc.), which made identifying potential  
556 interactions quite challenging. It should also be noted that although the total  
557 number of inoculated conidia per experiment was only 50-100 particles, only a  
558 fraction were within the imaged volume (Fig 4B,C). For these reasons and those  
559 mentioned earlier, the shuttling incidence that we report certainly  
560 underestimates the absolute rate.

561

562 The collective attributes of shuttles distinguish shuttling from all other forms of  
563 previously-described conidial transfer between leukocytes. Shuttles were  
564 unidirectional (neutrophil to macrophage), occurred only in the first hours after  
565 inoculation, and very distinctively, donor neutrophils were alive and mobile  
566 before and after shuttling and could shuttle one or more conidia. Recipient  
567 macrophages were also alive and mobile, and could be spore-naïve or pre-laden  
568 prior to shuttling. Shuttles were preceded by highly regionalized neutrophil-  
569 macrophage interactions and occurred through focal cell-to-cell interactions  
570 analogous to an intercellular synapse that sometimes resulted in tethering of the  
571 two cells together. Macrophages sometimes received aliquots of neutrophil  
572 cytoplasm along with the donated spore. This was demonstrated in some cases  
573 to be the concomitant transfer of neutrophil membrane around shuttled conidia,  
574 consistent with shuttles being the transfer of conidia-laden phagosomes between  
575 donor neutrophil and recipient macrophage, rather than just of conidia  
576 themselves. This transfer of donor cell membrane also distinguishes shuttling  
577 from “non-lytic exocytosis”, as described for the expulsion of previously-  
578 phagocytosed *Cryptococcus neoformans* from macrophages [13]. Furthermore,  
579 although non-lytic exocytosis expels the pathogen from a macrophage, it has not  
580 yet been described in the context of a concurrent interaction with another  
581 leukocyte lineage. The cytoplasmic exchange did not, however, provide a durable  
582 marker of shuttle occurrence, because the EGFP signal rapidly disappeared,  
583 mostly likely due to acidification of the phagolysosome, as is dramatically  
584 demonstrated by our example of the efferocytosis of an entire bead-laden  
585 neutrophil ([Supplementary Fig S3](#), [Supplementary Movie S5](#)).

586



587 Both dead and live conidia, labelled with either calcofluor or Alexa Fluor dye,  
588 were shuttled. This was consistent with a conidium-directed chemical stimulus  
589 driving shuttling, and excluded the possibility that shuttling was a conidium-  
590 labelling artefact. Furthermore, shuttling of conidia was conserved between two  
591 opportunistic fungal pathogen species, but the kinetics of shuttling was  
592 pathogen-specific. This suggested that shuttling was driven by a component  
593 common to the conidial cell wall of both species, but one present at different  
594 levels or exposed to phagocytes to different degrees [30]. Shuttling of zymosan  
595 particles provided further evidence locating a shuttling trigger to the cell wall  
596 (Fig 5A,C), leading  $\beta$ -glucan to be identified as a fungal-derived signal sufficient  
597 to drive shuttling of plastic beads (Fig 5B,D). A mutant *A. fumigatus* strain with  
598 reduced  $\beta$ -glucan trended to lower shuttling rates, also consistent with the  
599 hypothesis that conidial  $\beta$ -glucan directly drives shuttling. Since zymosan  
600 particles were observed to be shuttled from murine neutrophils to macrophages  
601 *in vitro* (Fig 7), shuttling is a conserved phenomenon between vertebrates and,  
602 as for other highly conserved phenomena in host defense, likely to play an  
603 important role in the outcome of infection.

604

605 Our current model for shuttling begins with priming of the spore-laden donor  
606 neutrophil and its engagement with the recipient macrophage through pre-  
607 shuttle contacts. Within the neutrophil, cytoskeletal rearrangement relocates the  
608 conidium within a membrane-lined phagosome towards the side of neutrophil  
609 proximate to the recipient macrophage. The conidium, still within its phagosome,  
610 is then transferred from the donor neutrophil to the recipient macrophage (Fig  
611 8). The  $\beta$ -glucan-dependent molecular signals involved remain unknown.

612 Phagocytosis of fungal pathogens by mammalian leukocytes involves a cluster of  
613 pathogen recognition receptors (PRRs) including Dectin-1, Toll-like receptor 2  
614 (TLR2) and Macrophage Mannose Receptor (MMR) [31]. As the mammalian  
615 receptor for  $\beta$ -glucan is Dectin-1 [27], it is likely that this receptor and  
616 downstream signaling pathways will be involved in conidial shuttling as well as  
617 phagocytosis. Although a homolog of mammalian Dectin-1 has yet to be  
618 identified in the zebrafish genome, known downstream signaling components  
619 such as spleen tyrosine kinase (Syk) have been studied [32]. As the neutrophil is  
620 clearly viable following the exchange, and as tethering involves only a small  
621 portion of the neutrophil membrane, it is improbable that the triggers are  
622 broadly displayed “eat me” signals of imminently apoptotic neutrophils such as  
623 phosphatidyl serine or calreticulin [33]. However, regionalized display of such  
624 signals might be possible. Testing these hypotheses will be challenging and will  
625 require cell-specific and temporally constrained approaches, as their global  
626 inhibition will inhibit initial neutrophil phagocytosis of conidia, which is a  
627 prerequisite for shuttling.

628

629 Neutrophil-to-macrophage pathogen shuttling poses other intriguing  
630 mechanistic questions. *Is it unique to fungal infection or does it occur more*  
631 *widely?* Neutrophil-to-macrophage cytoplasm transfer was observed during  
632 inflammation [25] suggesting that shuttling may be regulated by inflammatory  
633 cytokines. Macrophage cytoplasm transfer to melanoma tumor cells has recently  
634 been shown to augment metastatic dissemination, and may be another  
635 manifestation of this behaviour [3]. *Is shuttling achieved by repurposing of*  
636 *existing cellular machinery?* The tethering of separating participating cells

637 immediately after the interaction points to potential involvement of the  
638 neutrophil uropod, a structure under much traction stress and rich in actively  
639 rearranging cytoskeletal components such as actin-myosin bundles [34].  
640 Shuttling may be another manifestation of co-opted trogocytosis mechanisms, as  
641 described for macrophage-to-macrophage exchange of Gram negative bacteria  
642 [16]. However, trogocytosis-associated intercellular bacterial exchanges cannot  
643 involve  $\beta$ -glucan signalling.

644

645 The most tantalizing question is: *what is the impact on the microbiological*  
646 *outcome of the infection?* Tied up with this is whether shuttling serves to benefit  
647 the host or the pathogen. We recently showed in zebrafish models that  
648 macrophages provide an intracellular niche protecting *T. marneffe*i conidia from  
649 neutrophil fungicidal activity [20]. *A. fumigatus* conidia are also protected by  
650 macrophages from neutrophil fungicidal activities [20,23]. Hence fungal-driven  
651 shuttling may have evolved to optimize the location of invading conidia into the  
652 less hostile intracellular environment of macrophages. Certainly, for these two  
653 pathogens, shuttling augments initial conidial redistribution away from the  
654 unfavourable neutrophil intracellular environment into their viability-enhancing  
655 macrophage intracellular niche. Alternatively, shuttling may be a host-defense  
656 mechanism aiding adaptive immunity. Neutrophils are ineffective antigen-  
657 presenting cells, whereas macrophages specialize in this, therefore the potential  
658 outcome of neutrophil-to-macrophage transfer would be to make pathogen  
659 antigens accessible to the adaptive immune system. Delineating the viability  
660 outcome for shuttled conidia will require tools for tracing individual shuttled  
661 spore fate and/or longitudinal viability throughout the animal (not just in the

662 limited high-magnification imaged volume required to observe its occurrence),  
663 and for selectively impairing shuttling but not phagocytosis, neither of which is  
664 currently possible *in vivo*, where shuttling is most definitively observed.

665

666 Now that this additional phagocyte behaviour during fungal infection  
667 establishment has been recognized, its implications must be factored into future  
668 understanding of the initial host-pathogen interaction specifically, and into the  
669 view of neutrophil and macrophage behaviors generally.

670

## 671 **Materials and Methods**

672

### 673 **Zebrafish**

674 Zebrafish strains were wildtype (AB\*) carrying single transgenes or  
675 combinations of: *Tg(mpx:EGFP)<sup>i113</sup>* [35]; *Tg(mpeg1:Gal4FF)<sup>gl25</sup>* [25]; *Tg(UAS-*  
676 *E1b:Eco.NfsB-mCherry)<sup>c264</sup>* (Zebrafish International Stock Centre, Eugene, OR);  
677 *Tg(mpeg1:mCherry-CaaX)<sup>gl26</sup>* [20]; *Tg(mpx:EGFP-CaaX)<sup>gl27</sup>* [20]. Fish were held in  
678 the FishCore (Monash University) aquaria using standard practices. Embryos  
679 were held at 28°C in egg water (0.06 g/L salt (Red Sea, Sydney, Australia)) or E3  
680 medium (5 mM NaCl, 0.17 mM KCl, 0.33 mM CaCl<sub>2</sub>, 0.33 mM MgSO<sub>4</sub>, equilibrated  
681 to pH 7.0); from 12 hpf, 0.003% 1-phenyl-2-thiourea (Sigma-Aldrich) was added.  
682 All zebrafish embryos and larvae used in experiments were younger than 7 dpf.  
683 Zebrafish exhibit juvenile hermaphroditism, so gender balance in embryonic and  
684 larval experiments was not a consideration [36].

685

### 686 **Ethics and Biosafety Statement**

687 All animal experiments followed appropriate NHMRC guidelines. Zebrafish  
688 experiments were conducted under protocols approved by Ethics Committees of  
689 the Monash University (MAS/2010/18, MARP/2015/094). Zebrafish  
690 experiments were performed under Institution Biosafety Committee Notifiable  
691 Low Risk Dealing (NLRD) approval PC2-N23-10 (Monash University). *T.*  
692 *marneffe* and *A. fumigatus* were assigned to Risk Group 2 at the time these  
693 approvals were granted. In most jurisdictions, including endemic regions, *T.*  
694 *marneffe* is a risk group 2 organism. Protocols for mouse experiments were  
695 approved by the Walter and Eliza Hall Institute Animal Ethics Committee.

696

697 ***Talaromyces marneffe* and *Aspergillus fumigatus***

698 The *T. marneffe* strain SPM4 used in this study is a derivative of the FRR2161  
699 type strain [37]. For *A. fumigatus*, wild type *CEA10* [38] and mutant  
700  $\Delta gel1\Delta gel7\Delta cwh41$  [29] triple mutant strains were used.

701

702 To prepare fresh conidia for injection, *T. marneffe* and *A. fumigatus* conidial  
703 suspensions were inoculated onto Sabouraud Dextrose (SD) medium and  
704 cultured at 25°C for 10-12 days when the cultures were conidiating. Conidia  
705 were washed from the plate with dH<sub>2</sub>O, filtered, sedimented (6000 rpm, 10 min),  
706 resuspended in dH<sub>2</sub>O and stored at 4°C. For inoculation, conidia were  
707 resedimented and resuspended in Phosphate Buffered Saline (PBS). Fungal  
708 colony forming unit (CFUs) numbers per embryo were determined as previously  
709 described [20].

710

711 Cold-inactivation of *T. marneffe* conidia and calcofluor staining was as described  
712 previously [20,25]. To inactivate *A. fumigatus* conidia, they were  $\gamma$ -irradiated  
713 with 10 kGy [39] from a Gammacell 40 Exactor (Theratronics) as previously  
714 described [20] and verified as dead by lack of growth after 5 days incubation.  
715 Irradiated conidia still stained well with calcofluor and were microinjected at the  
716 same dilution of stock as used for live conidia.

717

718 **Zebrafish infection with *Talaromyces marneffe* and *Aspergillus fumigatus***

719 Freshly-prepared *T. marneffe* and *A. fumigatus* conidia stocks for these  
720 experiments were stored at 4°C for <2 months. For inoculation, 52 hpf tricaine-

721 anesthetized embryos were mounted on an agar mould with head/yolk within  
722 the well and tail laid flat on the agar. The fungal conidial suspension was  
723 inoculated intramuscularly into a somite aligned to the yolk extension tip for  
724 local infection [25,40] using a standard microinjection apparatus (Pico-Injector  
725 Microinjection System from Harvard Apparatus) and thin wall filament  
726 borosilicate glass capillary microinjection needle (SDR Clinical Technology,  
727 prepared using a P-2000 micropipette puller, Sutter Instruments). Inoculated  
728 embryos were held at 28°C. The delivered conidial dosage was verified by  
729 immediate CFU enumeration on a group of injected embryos [20]. It took  
730 approximately 10 minutes to commence imaging after inoculation; in this report,  
731 the zero time point ( $t=0$ ) is taken as the beginning of imaging.

732

### 733 **Calcofluor and Alexa Fluor 405 staining of conidia**

734 For calcofluor staining, spores were incubated in 10 mM calcofluor White  
735 (Sigma) for 30 minutes, followed by two washing steps and resuspension in  
736 distilled water.

737

738 To stain fungal conidia with Alexa Fluor 405 NHS Succinimidyl Ester (Life  
739 Technologies), 10  $\mu$ L of Alexa Fluor dye was added to 200  $\mu$ L of suspended  
740 conidia with gentle shaking at room temperature for 30 minutes followed by  
741 washing steps with PBS pH 8, 25 mM Tris pH 8.5 and finally resuspended in PBS  
742 pH 7, according to the supplier's protocol.

743

### 744 **Zymosan particles**

745 Zymosan A particles from *Saccharomyces cerevisiae* (Sigma) with average size of  
746 3  $\mu\text{m}$  were stained by calcofluor as for fungal conidia prior to microinjection.

747

#### 748 **Plastic Beads**

749 SPHERO™ fluorescent Light-Yellow Particles, high Intensity sized 1.7-2.2  $\mu\text{m}$   
750 (SPHEROTECH) (concentration 1.0% w/v in deionized water with 0.02% Sodium  
751 Azide) were used. These particles were kept in room temperature. Excitation and  
752 emission wavelengths were 400 and 450 nm. Customised commercially-  
753 prepared Light-Yellow Particles coated with laminarin as a source of  $\beta$ -glucan  
754 (SPHERO™ Laminarin Polysaccharide Fluorescent Particles, Lt. Yellow, 1.5-1.99  
755  $\mu\text{m}$ , Catalog no. LPFP1545-2, Lot no. AH01) were also used. Laminarin for  
756 coating was from *Laminaria digitata* (primarily poly( $\beta$ -Glc-[1 $\rightarrow$ 3])) with some  $\beta$ -  
757 [1 $\rightarrow$ 6] interstrand linkages and branch points; Sigma) [41,42].

758

#### 759 ***In vitro* studies using murine phagocytes**

760 Primary C57BL/6J mouse bone marrow leukocytes were collected and purified  
761 as previously described [43,44]. Macrophages were plated at  $5 \times 10^3$  of an 8-well  
762 plate incubated in Dulbecco's modified Eagle's medium with 10% foetal bovine  
763 serum and 20% L-929 conditioned medium for 16 hr. Primary bone marrow  
764 neutrophils were pre-loaded with Alexa Fluor 488-labelled opsonized zymosan  
765 particles for 1 hr at 37°C in Dulbecco's modified Eagle's medium and 10% fetal  
766 bovine serum. Preloaded neutrophils were added to adherent macrophages at  
767  $10^5$  cells per well. Imaging was performed on a Nikon Biostation IM-Q at  
768 37°C/10% CO<sub>2</sub>.

769



770 **Microscopy and image processing**

771 Routine brightfield and fluorescence imaging of zebrafish used an Olympus  
772 MVX10 stereo dissecting microscope with MV PLAPO 1X & 2XC objectives fitted  
773 with Olympus DP72 camera and Cellsense standard software version 1.11.

774

775 Confocal microscopy used a Zeiss LSM 5 Live with a Plan-Apochromat 20x, 0.8  
776 NA objective. ZEN software (2012, black edition 64 bit) was used for acquisition  
777 and images were 16-bit 512 x 512 pixels. Z-depth ranged from 35-130  $\mu\text{m}$   
778 ( $72 \pm 23 \mu\text{m}$ ) and composed of 20-40 slices ( $31 \pm 4$ ). Time intervals between z-  
779 stacks were set as zero to perform continuous acquisition (z-stack acquisition  
780 took  $33.24 \pm 9.50$  seconds). Excitatory laser wavelengths were 405 nm for  
781 calcofluor, 489 nm for EGFP and 561 nm for mCherry. Emission detection used a  
782 BP495-555 filter for calcofluor and EGFP and a LP575 filter for mCherry.  
783 Excitation/emission conditions for Light Yellow particles were the same as for  
784 calcofluor.

785

786 **Image processing and analysis**

787 All fluorescent image analyses were performed primarily in Imaris (BitPlane)  
788 software version 8.1.2 on Venom (Intel® Core™ i7-4770 Processor, 3.4 GHz) or  
789 Titan (Intel® Xeon® Processor E5-2680 v2 (2 x 2.80 GHz), RAM: 128 GB)  
790 computers (Monash Micro Imaging facility, Monash University). Some analyses  
791 used Fiji (ImageJ 1.46r) and Matlab® (The Mathworks™, Natick Mass, USA). For  
792 Fig 4a, data were analyzed in the R program using ggplot2 as previously [26,45].  
793 Figures were constructed using Adobe Illustrator CS5 (version 15.0.0).

794

## 795 **Shuttle detection and definition**

796 All *in vivo* shuttles were detected by systematic manual frame-by-frame  
797 inspection of movies. For these studies, a “shuttle” was stringently defined as a  
798 spore transfer event meeting all of the following criteria: (1) both donor and  
799 recipient cells were imaged *in toto* before, during and after the shuttle; (2) both  
800 donor and recipient cells demonstrated their viability before and after shuttling  
801 by migration; (3) the moment of donor-to-recipient cell transfer was visualised;  
802 (4) z-stack viewing unequivocally confirmed that conidia were within donor and  
803 recipient cells prior to and after the shuttle. Experience taught that shuttles were  
804 most easily recognized by watching movies in reverse and tracing the source of  
805 individual macrophage-located conidia. The identity of all 46 unequivocal  
806 shuttles meeting these criteria contributing to this report is assigned in  
807 [Supplementary Figure S1](#) and [Supplementary Table S1](#), and is indicated  
808 throughout the report.

809

## 810 **ShuttleFinder software**

811 The confocal time series were imported into Matlab® (version 8.1.0.604,  
812 R2013a) utilising the bioformats toolbox [46] and the conidia were tracked with  
813 PhagoSight [27]. The data input consisted of confocal time series with three  
814 channels, each containing the fluorescence of one cell type/conidium. PhagoSight  
815 was designed to track phagocytes in confocal time series. Since conidia are  
816 smaller than phagocytes, the reduction step of PhagoSight was only applied to  
817 large files, those that would have taken more than three days to process without  
818 it. To reduce the likelihood of false negatives, the automatic determined  
819 threshold for background separation by PhagoSight was lowered by 10%. For

820 each file, only the longest tracks were analyzed (upper third of track length over  
821 time). PhagoSight was used in command line mode without user interaction to  
822 allow for automated processing, using the MASSIVE cluster [47].

823

824 PhagoSight calculates a bounding box, which described the volume surrounding  
825 each tracked spore for each time frame. The intensity of the voxels in the two  
826 channels describing neutrophils and macrophages was summed over this  
827 bounding box and a proportional index  $r$  between both was calculated

$$828 \quad \frac{\sum_{xyz} I_{\text{red}}(x,y,z) - \sum_{xyz} I_{\text{green}}(x,y,z)}{\sum_{xyz} I_{\text{red}}(x,y,z) + \sum_{xyz} I_{\text{green}}(x,y,z)}$$

829 with  $I$  describing the Intensity of one channel. This ratio was smoothed with a  
830 moving average filter over three imaging frames to remove noise caused by  
831 imperfections in the tracking process. Subsequently, a point in a track was  
832 defined as being in a macrophage (red channel) if the values lie between 1 and  
833 0.2, conversely in a neutrophil (green channel) for a value between -0.2 and -1.  
834 To be classified as a candidate shuttle event, the  $r$  values for a conidium track  
835 had to pass from either -0.2 to 0.2 (for a neutrophil to macrophage shuttle) or  
836 vice versa.

837

838 The time the tracked conidium reached the threshold was considered the  
839 beginning of the shuttle. The end of the shuttle event was defined by the track  
840 leaving the threshold area.

841

842 **Statistics**

843 Descriptive and analytical statistics were prepared in Prism 5.0c (GraphPad  
844 Software Inc). Unless otherwise stated, data are mean±SD, with p-values  
845 generated from two-tailed unpaired t-tests for normally distributed continuous  
846 variables, and Chi-squared tests for categorical variables.

## 847 **Acknowledgements**

848 We thank our colleagues who have provided comment and advice on this project  
849 and/or encouraged us to persist as it progressed over several years, particularly:

850 Dr M.C. Keightley, Dr P. Currie. This work was supported by the Multi-modal  
851 Australian ScienceS Imaging and Visualisation Environment (MASSIVE)  
852 ([www.massive.org.au](http://www.massive.org.au)).

853 Grant support:

854 GL, AA, National Health and Medical Research Council (461208, 637394,  
855 1044754, 1069284).

856 BC, National Health and Medical Research Council (637367) Australian Research  
857 Council (DP1094854), National Institutes of Health (5R01HL124209).

858 FE and LP, Australian Postgraduate Award, Walter and Eliza Hall Institute Edith  
859 Moffatt Scholarship.

860 FE, Monash University Bridging Postdoctoral Fellowship, and while working on  
861 writing this manuscript while in the laboratory of Dr D. Irimia, he was supported  
862 by the MGH BioMEMS Center (National Institutes of Health, Grant EB002503).

863 VP, Monash Graduate Scholarship, Monash International Postgraduate Research  
864 Fellowship, Monash Postgraduate Publication Award.

865 JO, Dora Lush Scholarship (National Health and Medical Research Council).

866 The Australian Regenerative Medicine Institute is supported by grants from the  
867 State Government of Victoria and the Australian Government.

868

## 869 **Author Contributions**

870 Listed using the CRediT taxonomy.

871 **Conceptualization:** Vahid Pazhakh, Felix Ellett, Luke Pase, Joanne A. O'Donnell,

872 Ben A. Croker, Alex Andrianopoulos, Graham J. Lieschke.

873 **Formal analysis:** Vahid Pazhakh, Felix Ellett, Joanne A. O'Donnell, Keith E.

874 Schulze, R. Stefan Greulich, Ben A. Croker, Alex Andrianopoulos, Graham J.

875 Lieschke.

876 **Funding acquisition:** Alex Andrianopoulos, Graham J. Lieschke.

877 **Investigation:** Vahid Pazhakh, Felix Ellett, Joanne A. O'Donnell, R. Stefan

878 Greulich, Ben A. Croker, Graham J. Lieschke.

879 **Methodology:** Vahid Pazhakh, Felix Ellett, Joanne A. O'Donnell, R. Stefan

880 Greulich, Keith Schulze, C. Carlos Reyes-Aldasoro, Ben A. Croker, Alex

881 Andrianopoulos, Graham J. Lieschke.

882 **Software:** R. Stefan Greulich, C. Carlos Reyes-Aldasoro.

883 **Supervision:** Ben A. Croker, Alex Andrianopoulos, Graham J. Lieschke.

884 **Writing - original draft:** Vahid Pazhakh, Felix Ellett, Alex Andrianopoulos,

885 Graham J. Lieschke.

886 **Writing - review and editing:** Vahid Pazhakh, Felix Ellett, Luke Pase, Keith

887 Schulze, Joanne A. O'Donnell, R. Stefan Greulich, C. Carlos Reyes-Aldasoro, Ben A.

888 Croker, Alex Andrianopoulos, Graham J. Lieschke.

## 890 **References**

891

- 892 1. Kaufmann SH (2008) Immunology's foundation: the 100-year anniversary  
893 of the Nobel Prize to Paul Ehrlich and Elie Metchnikoff. *Nat Immunol* 9:  
894 705-712.
- 895 2. Uribe-Querol E, Rosales C (2017) Control of Phagocytosis by Microbial  
896 Pathogens. *Frontiers in Immunology* 8.
- 897 3. Roh-Johnson M, Shah AN, Stonick JA, Poudel KR, Kargl J, et al. (2017)  
898 Macrophage-Dependent Cytoplasmic Transfer during Melanoma Invasion  
899 In Vivo. *Developmental cell* 43: 549-562 e546.
- 900 4. McCoy-Simandle K, Hanna SJ, Cox D (2016) Exosomes and nanotubes:  
901 Control of immune cell communication. *Int J Biochem Cell Biol* 71: 44-54.
- 902 5. Weidle UH, Birzele F, Kollmorgen G, Ruger R (2017) The Multiple Roles of  
903 Exosomes in Metastasis. *Cancer Genomics Proteomics* 14: 1-15.
- 904 6. Zomer A, Maynard C, Verweij FJ, Kamermans A, Schafer R, et al. (2015) In  
905 Vivo imaging reveals extracellular vesicle-mediated phenocopying of  
906 metastatic behavior. *Cell* 161: 1046-1057.
- 907 7. Spinner JL, Winfree S, Starr T, Shannon JG, Nair V, et al. (2014) *Yersinia*  
908 *pestis* survival and replication within human neutrophil phagosomes and  
909 uptake of infected neutrophils by macrophages. *J Leukoc Biol* 95: 389-  
910 398.
- 911 8. Martin CJ, Peters KN, Behar SM (2014) Macrophages clean up:  
912 efferocytosis and microbial control. *Curr Opin Microbiol* 17: 17-23.
- 913 9. Karaji N, Sattentau QJ (2017) Efferocytosis of Pathogen-Infected Cells.  
914 *Frontiers in immunology* 8: 1863.

- 915 10. Yang CT, Cambier CJ, Davis JM, Hall CJ, Crosier PS, et al. (2012)  
916 Neutrophils exert protection in the early tuberculous granuloma by  
917 oxidative killing of mycobacteria phagocytosed from infected  
918 macrophages. *Cell host & microbe* 12: 301-312.
- 919 11. Bain JM, Lewis LE, Okai B, Quinn J, Gow NA, et al. (2012) Non-lytic  
920 expulsion/exocytosis of *Candida albicans* from macrophages. *Fungal*  
921 *Genet Biol* 49: 677-678.
- 922 12. Nicola AM, Robertson EJ, Albuquerque P, Derengowski Lda S, Casadevall A  
923 (2011) Nonlytic exocytosis of *Cryptococcus neoformans* from  
924 macrophages occurs in vivo and is influenced by phagosomal pH. *MBio* 2.
- 925 13. Ma H, Croudace JE, Lammas DA, May RC (2007) Direct cell-to-cell spread  
926 of a pathogenic yeast. *BMC Immunol* 8: 15.
- 927 14. Shah A, Kannambath S, Herbst S, Rogers A, Soresi S, et al. (2016)  
928 Calcineurin Orchestrates Lateral Transfer of *Aspergillus fumigatus* during  
929 Macrophage Cell Death. *Am J Resp Crit Care* 194: 1127-1139.
- 930 15. Armstrong-James D, de Boer L, Bercusson A, Shah A (2018) From  
931 phagocytosis to metaforosis: Calcineurin's deadly role in innate  
932 processing of fungi. *PLoS pathogens* 14: e1006627.
- 933 16. Steele S, Radlinski L, Taft-Benz S, Brunton J, Kawula TH (2016)  
934 Trogocytosis-associated cell to cell spread of intracellular bacterial  
935 pathogens. *eLife* 5.
- 936 17. Kaufmann SHE, Dorhoi A, Hotchkiss RS, Bartenschlager R (2018) Host-  
937 directed therapies for bacterial and viral infections. *Nat Rev Drug Discov*  
938 17: 35-56.



- 939 18. Keightley MC, Wang CH, Pazhakh V, Lieschke GJ (2014) Delineating the  
940 roles of neutrophils and macrophages in zebrafish regeneration models.  
941 *The international journal of biochemistry & cell biology* 56: 92-106.
- 942 19. Renshaw SA, Trede NS (2012) A model 450 million years in the making:  
943 zebrafish and vertebrate immunity. *Disease Models & Mechanisms* 5: 38-  
944 47.
- 945 20. Ellett F, Pazhakh V, Pase L, Benard EL, Weerasinghe H, et al. (2018)  
946 Macrophages protect *Talaromyces marneffe* conidia from  
947 myeloperoxidase-dependent neutrophil fungicidal activity during  
948 infection establishment in vivo. *PLoS pathogens* 14: e1007063.
- 949 21. Knox BP, Huttenlocher A, Keller NP (2017) Real-time visualization of  
950 immune cell clearance of *Aspergillus fumigatus* spores and hyphae.  
951 *Fungal Genet Biol* 105: 52-54.
- 952 22. Knox DM (1999) Core body temperature, skin temperature, and interface  
953 pressure. Relationship to skin integrity in nursing home residents. *Adv*  
954 *Wound Care* 12: 246-252.
- 955 23. Rosowski EE, Raffa N, Knox BP, Golenberg N, Keller NP, et al. (2018)  
956 Macrophages inhibit *Aspergillus fumigatus* germination and neutrophil-  
957 mediated fungal killing. *PLoS pathogens* 14: e1007229.
- 958 24. Knox BP, Deng Q, Rood M, Eickhoff JC, Keller NP, et al. (2014) Distinct  
959 innate immune phagocyte responses to *Aspergillus fumigatus* conidia and  
960 hyphae in zebrafish larvae. *Eukaryotic cell* 13: 1266-1277.
- 961 25. Ellett F, Pase L, Hayman JW, Andrianopoulos A, Lieschke GJ (2011) mpeg1  
962 promoter transgenes direct macrophage-lineage expression in zebrafish.  
963 *Blood* 117: e49-56.

- 964 26. Lammermann T, Afonso PV, Angermann BR, Wang JM, Kastenmuller W, et  
965 al. (2013) Neutrophil swarms require LTB4 and integrins at sites of cell  
966 death in vivo. *Nature* 498: 371-375.
- 967 27. Henry KM, Pase L, Ramos-Lopez CF, Lieschke GJ, Renshaw SA, et al.  
968 (2013) PhagoSight: an open-source MATLAB(R) package for the analysis  
969 of fluorescent neutrophil and macrophage migration in a zebrafish model.  
970 *PloS one* 8: e72636.
- 971 28. Free SJ (2013) Fungal cell wall organization and biosynthesis. *Advances in*  
972 *genetics* 81: 33-82.
- 973 29. Zhao W, Li CL, Liang JN, Sun SF (2014) The *Aspergillus fumigatus* beta-  
974 1,3-glucanosyltransferase Gel7 plays a compensatory role in maintaining  
975 cell wall integrity under stress conditions. *Glycobiology* 24: 418-427.
- 976 30. Arana DM, Prieto D, Roman E, Nombela C, Alonso-Monge R, et al. (2009)  
977 The role of the cell wall in fungal pathogenesis. *Microbial biotechnology* 2:  
978 308-320.
- 979 31. Inoue M, Shinohara ML (2014) Clustering of pattern recognition receptors  
980 for fungal detection. *PLoS Pathog* 10: e1003873.
- 981 32. Christie TL, Carter A, Rollins EL, Childs SJ (2010) Syk and Zap-70 function  
982 redundantly to promote angioblast migration. *Developmental biology*  
983 340: 22-29.
- 984 33. Duffin R, Leitch AE, Fox S, Haslett C, Rossi AG (2010) Targeting  
985 granulocyte apoptosis: mechanisms, models, and therapies. *Immunol Rev*  
986 236: 28-40.

- 987 34. Yoo SK, Lam PY, Eichelberg MR, Zasadil L, Bement WM, et al. (2012) The  
988 role of microtubules in neutrophil polarity and migration in live zebrafish.  
989 *Journal of Cell Science* 125: 5702-5710.
- 990 35. Renshaw SA, Loynes CA, Trushell DM, Elworthy S, Ingham PW, et al.  
991 (2006) A transgenic zebrafish model of neutrophilic inflammation. *Blood*  
992 108: 3976-3978.
- 993 36. Hsiao CD, Tsai HJ (2003) Transgenic zebrafish with fluorescent germ cell:  
994 a useful tool to visualize germ cell proliferation and juvenile  
995 hermaphroditism in vivo. *Dev Biol* 262: 313-323.
- 996 37. Borneman AR, Hynes MJ, Andrianopoulos A (2001) An STE12 homolog  
997 from the asexual, dimorphic fungus *Penicillium marneffeii* complements  
998 the defect in sexual development of an *Aspergillus nidulans steA* mutant.  
999 *Genetics* 157: 1003-1014.
- 1000 38. Fedorova ND, Khaldi N, Joardar VS, Maiti R, Amedeo P, et al. (2008)  
1001 Genomic islands in the pathogenic filamentous fungus *Aspergillus*  
1002 *fumigatus*. *PLoS genetics* 4: e1000046.
- 1003 39. Gumus T, Geegel U, Demirci AS, Arici M (2008) Effects of gamma  
1004 irradiation on two heat resistant moulds: *Aspergillus fumigatus* and  
1005 *Paecilomyces variotii* isolated from margarine. *Radiat Phys Chem* 77: 680-  
1006 683.
- 1007 40. Benard EL, van der Sar AM, Ellett F, Lieschke GJ, Spaink HP, et al. (2012)  
1008 Infection of zebrafish embryos with intracellular bacterial pathogens. *J Vis*  
1009 *Exp* 3781 [pii] 10.3791/3781.
- 1010 41. Brown GD, Gordon S (2001) Immune recognition. A new receptor for  
1011 beta-glucans. *Nature* 413: 36-37.

- 1012 42. Rubin-Bejerano I, Abeijon C, Magnelli P, Grisafi P, Fink GR (2007)  
1013 Phagocytosis by human neutrophils is stimulated by a unique fungal cell  
1014 wall component. *Cell host & microbe* 2: 55-67.
- 1015 43. Croker BA, Lewis RS, Babon JJ, Mintern JD, Jenne DE, et al. (2011)  
1016 Neutrophils require SHP1 to regulate IL-1beta production and prevent  
1017 inflammatory skin disease. *Journal of immunology* 186: 1131-1139.
- 1018 44. Masters SL, Gerlic M, Metcalf D, Preston S, Pellegrini M, et al. (2012)  
1019 NLRP1 inflammasome activation induces pyroptosis of hematopoietic  
1020 progenitor cells. *Immunity* 37: 1009-1023.
- 1021 45. Bhuiyan MS, Ellett F, Murray GL, Kostoulis X, Cerqueira GM, et al. (2016)  
1022 *Acinetobacter baumannii* phenylacetic acid metabolism influences  
1023 infection outcome through a direct effect on neutrophil chemotaxis.  
1024 *Proceedings of the National Academy of Sciences of the United States of*  
1025 *America* 113: 9599-9604.
- 1026 46. Linkert M, Rueden CT, Allan C, Burel JM, Moore W, et al. (2010) Metadata  
1027 matters: access to image data in the real world. *Journal of Cell Biology*  
1028 189: 777-782.
- 1029 47. Goscinski WJ, McIntosh P, Felzmann U, Maksimenko A, Hall CJ, et al.  
1030 (2014) The multi-modal Australian ScienceS Imaging and Visualization  
1031 Environment (MASSIVE) high performance computing infrastructure:  
1032 applications in neuroscience and neuroinformatics research. *Front*  
1033 *Neuroinform* 8.
- 1034  
1035

1036 **FIGURE LEGENDS**

1037

1038 **Figure 1. Shuttling of individual *T. marneffei* conidia from neutrophil to**

1039 **macrophage.**

1040 A. A representative standard shuttle of a calcofluor-stained conidium (blue)  
1041 from a *Tg(mpx:EGFP)* neutrophil (green) to a *Tg(mpeg1:Gal4FF)x(UAS-*  
1042 *E1b:Eco.NfsB-mCherry)* macrophage (red), corresponding to the example in  
1043 [Supplementary Movie S1a](#). Panels include isometric orthogonal yz and xz  
1044 views corresponding to the xy maximal intensity projection, and indicate  
1045 the time in minutes from start of movie. The time point colored white-on-  
1046 black is the moment of transfer. Colored arrowheads indicate the conidium  
1047 within donor neutrophil (green), at the point of intercellular transfer  
1048 (white) and in the recipient macrophage (red).

1049 B-D. Volume-rendered views of the standard shuttle in (A), detailed before (B),  
1050 at the moment of transfer (C) and after (D), demonstrating the intracellular  
1051 location of the shuttled spore in donor neutrophil and recipient  
1052 macrophage, the focal intercellular contact at the moment of transfer. Cii is  
1053 the image in Ci rotated 45° around a central vertical axis in the direction  
1054 shown. Images Bii, Ciii and Dii are sectioned volume-rendered views; a  
1055 sectioned plane is represented by a red box.

1056 E-F. Shuttle demonstrating tethering of the departing recipient macrophage  
1057 following a shuttle. Panel E presentation organized as in panel A. The  
1058 tethered moment of transfer is detailed by volume-rendering in F,  
1059 presented as in panels B-D.

1060

1061 Scales as shown. Stills in A and E correspond to [Supplementary Movie 1a,b](#)  
1062 respectively.

1063

1064 **Figure 2. Variant shuttles of fungal conidia from neutrophil to macrophage.**

1065 A variety of shuttles of conidia (blue) from *Tg(mpx:EGFP)* neutrophils  
1066 (green) to *Tg(mpeg1:Gal4FF)x(UAS-E1b:Eco.NfsB-mCherry)* macrophages  
1067 (red). In each example, panels include isometric orthogonal yz and xz views  
1068 corresponding to the xy maximal intensity projection, and indicate the time  
1069 in minutes from start of movie. Time points colored white-on-black are the  
1070 moments of transfer). (A,C,E) include volume-rendered views  
1071 corresponding to the maximal intensity projection; where this volume is  
1072 sectioned, the framing box is shown in red. Colored arrowheads indicate  
1073 the conidium within donor neutrophil (green), at the point of intercellular  
1074 transfer (white) and in the recipient macrophage (red).

1075 **A-C. Shuttles of *T. marneffe*i conidia.**

1076 A. Shuttle demonstrating tethering of the donor neutrophil at the moment of  
1077 transfer.  
1078 B. Shuttle of multiple conidia from one donor neutrophil in quick succession.  
1079 First two frames show donor neutrophil laden with multiple conidia at two  
1080 pre-shuttle time points. Frames from t=96:49-100:48 sec are maximal  
1081 intensity projections only, encompassing the shuttling transfer of 3 conidia  
1082 over 4 minutes. Upper row of panels shows red (macrophage) and blue  
1083 (conidia) channels only, lower row of panels includes the green channel  
1084 (donor neutrophil).

1085 C. Shuttle of two conidia from one donor neutrophil one after the other at an  
1086 interval of 2 min 13 seconds. Volume-rendered images corresponding to  
1087 maximal intensity projections show the two shuttled conidia (labelled 1  
1088 and 2) before, during and after the shuttle.

1089 **D-F Shuttles of *A. fumigatus* conidia.**

1090 D. Standard shuttle of single conidium.

1091 E. Standard shuttle of conidium labelled with Alexfluor 405 rather than  
1092 calcofluor, accompanied by volume-rendered images which focus attention  
1093 onto the conidium and donor neutrophil of interest.

1094 F. Two independent shuttles by different donor neutrophils occurring in the  
1095 same field. In this series, the course of each shuttled spore is followed by  
1096 white and yellow arrowheads.

1097

1098 Scales as shown. Stills in A-E correspond to [Supplementary Movies S1c, e, f,](#)  
1099 [and S2a, c, e](#) respectively.

1100

1101 **Figure 3. Shuttling of *T. marneffe*i conidia between neutrophils and**

1102 **macrophages involves phagosome transfer.**

1103 A. Shuttle of calcofluor-stained conidium (blue) from *Tg(mpx:EGFPCaaX)*  
1104 neutrophils (green) to *Tg(mpeg1:mCherryCaaX)* macrophages (red). These  
1105 reporter lines have membrane-localised fluorophore expression. Panels  
1106 include isometric orthogonal yz and xz views corresponding to the xy  
1107 maximal intensity projection, and indicate the time in minutes from start of  
1108 the movie. Colored arrowheads indicate a conidium before it is  
1109 phagocytosed by the donor neutrophil (red), conidia within the donor

1110 neutrophil (yellow), and the conidium at the point of intercellular transfer  
1111 and within the recipient macrophage (white).  
1112 B. (i) Detail of the boxed area of the donor neutrophil in (A, 6 min panel).  
1113 Yellow dotted line indicates the position of the cross-section for the 3-color  
1114 fluorescence intensity plots in (ii) and (iii). Both shuttled and non-shuttled  
1115 conidia are flanked by peaks of green fluorescence, consistent with their  
1116 location in a membrane-lined phagosome.  
1117 C, D. Cross-sections fluorescence intensity profiles (ii) corresponding to the  
1118 yellow lines in (i), for two macrophages that received a spore from a  
1119 neutrophil in this dataset, which contained 3 independent spore shuttles.  
1120 The arrowed EGFP-channel signal demonstrates the transfer of neutrophil-  
1121 derived EGFP-tagged membrane in the vicinity of the spore (blue channel  
1122 signal).  
1123  
1124 Scales as shown. Stills in A correspond to [Supplementary Movie 3a](#).

1125

1126 **Figure 4. Phagocyte mobility during shuttling.**

1127 A. Cell tracking analysis of neutrophil and macrophages following  
1128 intramuscular inoculation of *T. marneffei* conidia. A chemotactic index (red,  
1129 movement towards infection; blue, movement away) and velocity  
1130 (thickness of the line). Neutrophil migration towards the infection is earlier  
1131 and faster; macrophage migration is later and slower.  
1132 B. Output of ShuttleFinder software, for the shuttle shown in Fig 1A. Track  
1133 color indicates the cellular context of the conidium (green, neutrophil; red,  
1134 macrophage). (i) shows the shuttled spore track in xy dimensions and time.



1135 (ii) shows it in xyz dimensions. The two outputs collectively show that the  
1136 shuttle occurred between donor and recipient phagocytes that were mobile  
1137 in both space and time. Imaging parameters: x, y, 1.31 pixels/ $\mu\text{m}$ ; z interval,  
1138 3.3  $\mu\text{m}$ /slice; frame rate, 28.0 sec/frame.

1139 C. Plots of donor neutrophil and recipient macrophage cell displacement from  
1140 the shuttle spore location over two fixed 5 min time intervals before and  
1141 after the moment of shuttle, for *T. marneffeii* shuttles (i), and *A. fumigatus*  
1142 (ii). Note that displacement is a measured distance without directional  
1143 information. Data are mean $\pm$ SEM at each time point (i, n=10; ii, n=7). P-  
1144 values from paired t-tests: \* <0.05; \*\*\* $\leq$ 0.001; ns, not significant.

1145

1146 **Figure 5. Dynamics of neutrophil to macrophage conidial shuttles.**

1147 A. Time maps of cellular contact during shuttles. Charts are aligned with  
1148 time=0 at the point of initial donor/recipient cell contact. Chart shows:  
1149 time of conidial residence in donor neutrophil prior to intercellular contact  
1150 (green line; vertical bar indicates resident at start of imaging; otherwise  
1151 line start indicates point of neutrophil phagocytosis); time of general  
1152 intercellular contact (blue line); period of contact during actual conidial  
1153 transfer (orange bars). Charts are for each of 20 stringently-defined  
1154 unequivocal shuttles (n=13 *T. marneffeii*, n=7 *A. fumigatus*) tabulated and  
1155 identified as in [Supplementary Figure S1](#). The entire sequence from  
1156 phagocytosis to cell separation is shown unless vertical bars at beginning  
1157 or end of lines indicate the start or end of the imaging file; blue and green  
1158 numbers indicate endpoint times where lines have been clipped.

1159 B,C. For *T. marneffei* (B) and *A. fumigatus* (C) infections, histograms of number  
1160 of experiments with and without observed shuttles, by number of conidia  
1161 present in the initial imaging volume.

1162 D. For conidia-laden neutrophils, duration of shuttling contacts (n=20  
1163 shuttles) compared to random non-shuttling contact (n=34). Data are  
1164 summarized by median and range.

1165 E. Distribution of times of shuttle after imaging commenced for *T. marneffei*  
1166 and *A. fumigatus*. P=0.016 for categorical variable of shuttles occurring at  
1167  $\leq 60$  and  $>60$  min between the two fungal species (Fisher's exact test).

1168

1169 **Figure 6.  $\beta$ -glucan is a fungal determinant sufficient to trigger shuttling.**

1170 A,B. Relative frequency of shuttles for different cargoes, incidence computed for  
1171 each condition as number of 3 hour imaging datasets with shuttle(s) / total  
1172 number of imaging datasets. By Chi-squared analysis, there are no  
1173 significant differences for the comparisons: live spores of the two species  
1174 (p=0.38); live and dead *T. marneffei* (p=0.31); dead spores of the two  
1175 species (p=0.34). n values indicate the number of datasets in each category.

1176 C,D. Images of representative shuttles of zymosan particle (C) and  $\beta$ -glucan  
1177 coated plastic beads (D).

1178 Shuttles of particles (blue) are from *Tg(mpx:EGFP)* neutrophils (green) to

1179 *Tg(mpeg1:Gal4FF)x(UAS-E1b:Eco.NfsB-mCherry)* macrophages (red). In

1180 each example, panels include isometric orthogonal yz and xz views

1181 corresponding to the xy maximal intensity projection, and indicate the time

1182 in minutes from start of movie. Colored arrowheads indicate the conidium

1183 within donor neutrophil (green), at the point of intercellular transfer  
1184 (white) and in the recipient macrophage (red).  
1185  
1186 Scales as shown. Stills in C,D correspond to [Supplementary Movie S5a,c](#)  
1187 respectively.

1188

1189

1190 **Figure 7. Zymosan shuttles by murine neutrophils and macrophages.**

1191 A, B. Two sequences demonstrating neutrophil to macrophage shuttling of Alexa  
1192 Fluor 488-labelled zymosan particle between murine phagocytes *in vitro*.  
1193 Panel (i) is a schematic showing the elongated, adherent recipient  
1194 macrophage. Panels (ii-viii) are brightfield photomicrographs with green  
1195 fluorescence channel overlaid, time points indicated in min:sec. Red arrow  
1196 indicates the shuttled particle in donor neutrophil (panels ii-vi) and then  
1197 following shuttling within the recipient macrophage (panels vii-viii). Stills  
1198 from [Supplementary Movie 6](#).

1199

1200 **Figure 8. Model of neutrophil to macrophage conidial shuttles.**

1201 Schematic indicates 5 steps in neutrophil to macrophage conidial shuttling  
1202 that accommodates morphological and mechanistic insights from these  
1203 studies. Undefined signals slow the donor neutrophil and recipient  
1204 macrophage and bring them into proximity (a), leading to  $\beta$ -glucan  
1205 dependent intercellular shuttling signals and spore relocation within donor  
1206 cell toward recipient macrophage (b). An intercellular synapse forms with  
1207 tethering (c), leading to phagosome transfer (d), and its incorporation into

1208 recipient macrophages, at least initially retaining components of the  
1209 membrane-lined donor cell phagosome (e). Both donor and recipient cells  
1210 remain active following shuttling and eventually both depart (e).  
1211  
1212

1213 **SUPPLEMENTARY FIGURE LEGENDS**

1214

1215 **Supplementary Figure S1. Imaging datasets.**

1216 Details of the imaging datasets in which the defining set of shuttles of 13 *T.*  
1217 *marneffeii* (A) and 7 *A. fumigatus* (B) conidia meeting stringent definition  
1218 criteria were found. Graphs show the distribution of imaging file lengths,  
1219 which files contained a shuttle (black columns), the shuttle ID (#), the  
1220 shuttle movie length (L) and the time of shuttle (yellow mark in black  
1221 column, and red numeral in minutes). Corresponds to [Figs 1, 2, 4](#) and  
1222 [Supplementary Table S1](#).

1223

1224 **Supplementary Figure S2. Examples of probable shuttles**

1225 A variety of shuttles of conidia or particles (blue) from *Tg(mpx:EGFP)*  
1226 neutrophils (green) to *Tg(mpeg1:Gal4FF)x(UAS-E1b:Eco.NfsB-mCherry)*  
1227 macrophages (red). In each example, panels include isometric orthogonal  
1228 yz and xz views corresponding to the xy maximal intensity projection, and  
1229 indicate the time in minutes from start of movie. Colored arrowheads  
1230 indicate the conidium/particle within donor neutrophil (green), at the  
1231 point of intercellular transfer (white) and in the recipient macrophage  
1232 (red).

1233 **A-C. Probable shuttles of conidia.**

1234 A. A probable shuttle in which the conidium is not clearly resolved as fully  
1235 contained within the donor neutrophil.

1236 B-C. Probable shuttles of conidia in which the point of cell-to-cell contact is not  
1237 clearly displayed.

1238 D. An example of a crowded field with multiple neutrophils and macrophages  
1239 in which initially there are neutrophils laden with conidia and by the end  
1240 conidia are mostly within macrophages, although the transfer of conidia is  
1241 not clearly seen.

1242

1243 Scales as shown. Stills in A-D correspond to [Supplementary Movie S4a-d](#)  
1244 respectively.

1245

1246 **Supplementary Figure S3. Efferocytosis of an entire bead-laden neutrophil.**

1247 Phagocytosis of inert 2  $\mu\text{m}$  plastic beads (blue) by *Tg(mpx:EGFP)*  
1248 neutrophils (green), followed by efferocytosis of the whole particle-laden  
1249 neutrophil by a *Tg(mpeg1:Gal4FF)x(UAS-E1b:Eco.NfsB-mCherry)*  
1250 macrophage (red). Subsequently the EGFP signal of the engulfed neutrophil  
1251 is extinguished although the Alexa Fluor signal (blue) of the plastic beads  
1252 persists (right panel). Panels include isometric orthogonal yz and xz views  
1253 corresponding to the xy maximal intensity projection, and indicate the time  
1254 in minutes from start of movie. White arrowheads follow the neutrophil of  
1255 interest through the process.

1256

1257 Scale as shown. Stills from [Supplementary Movie S5b](#).

1258

1259

1260 **SUPPLEMENTARY MOVIE LEGENDS**

1261

1262 **Supplementary Movie S1. Six examples of live *T. marneffei* conidial shuttles.**

1263 Shuttles are of live calcofluor-stained conidia (blue) from a *Tg(mpx:EGFP)*

1264 neutrophil (green) to a *Tg(mpeg1:Gal4FF)x(UAS-E1b:Eco.NfsB-mCherry)*

1265 macrophage (red). Movies run in series. Movies are paused at the moment

1266 of shuttling, with the point of transfer labelled (white arrow).

1267 a. Standard shuttle (corresponds to [Fig 1A](#)).

1268 b. Standard shuttle with tethered recipient macrophage (corresponds to [Fig](#)

1269 [1E](#)).

1270 c. Standard shuttle with tethered donor neutrophil (corresponds to [Fig 2A](#)).

1271 d. Standard shuttle with tethered departing donor neutrophil.

1272 e. Standard shuttle of multiple spores in quick succession (corresponds to [Fig](#)

1273 [2B](#)).

1274 f. Two conidia shuttled asynchronously (corresponds to [Fig 2C](#)).

1275

1276 **Supplementary Movie S2. Six examples of *A. fumigatus* conidial shuttles.**

1277 Shuttles are of live calcofluor-stained conidia (blue) from a *Tg(mpx:EGFP)*

1278 neutrophil (green) to a *Tg(mpeg1:Gal4FF)x(UAS-E1b:Eco.NfsB-mCherry)*

1279 macrophage (red). Movies run in series. Movies are paused at the moment

1280 of shuttling, with the point of transfer labelled (white arrow).

1281 a. Standard shuttle.

1282 b. Standard shuttle.

1283 c. Standard shuttle of Alexa Fluor 405-stained conidium (corresponds to [Fig](#)

1284 [2E](#)).

1285 d. Shuttling involving a highly polarized and tethered neutrophil and  
1286 macrophage interaction.

1287 e. Two independent shuttles occurring in the same field.

1288 f. Two conidia shuttled together.

1289

1290 **Supplementary Movie S3. Four examples of dead *T. marneffei* conidial**

1291 **shuttles.**

1292 Shuttles are of dead calcofluor-stained conidia (blue) from a

1293 *Tg(mpx:EGFPCaaX)* neutrophil (green) to a *Tg(mpeg1:mCherryCaaX)*

1294 macrophage (red). Movies run in series. Movies are paused at the moment

1295 of shuttling, with the point of transfer labelled (white arrow). These

1296 reporter lines localize the fluorophore to the membrane, enabling these

1297 movies to display volume-rendered version of donor neutrophil and

1298 recipient macrophages in parallel (right panels).

1299 a-c. Three independent shuttles of individual dead conidia, all occurring in the

1300 same movie (shuttle (a) corresponds to [Fig 3A](#)).

1301 d. Standard shuttle of a dead conidium.

1302

1303 **Supplementary Movie S4. Four examples of probable conidial shuttles not**

1304 **meeting all definition criteria.**

1305 Shuttles are of live calcofluor-stained conidia (blue) from a *Tg(mpx:EGFP)*

1306 neutrophil (green) to a *Tg(mpeg1:Gal4FF)x(UAS-E1b:Eco.NfsB-mCherry)*

1307 macrophage (red). Movies run in series. Movies are paused at the moment

1308 of shuttling, with the point of transfer labelled (white arrow).



- 1309 a. Probably shuttle in which the conidium is not unequivocally resolved as  
1310 being within the donor neutrophil (corresponds with [Supplementary Fig](#)  
1311 [S2A](#)).
- 1312 b,c. Probable shuttles in which direct intercellular contact between donor  
1313 neutrophil and recipient macrophage is not clearly displayed (corresponds  
1314 with [Supplementary Fig S2B-C](#)).
- 1315 d. Crowded field in which there are initially neutrophil-laden conidia, and at  
1316 the end, macrophage-laden conidia, but the crowding obscures probable  
1317 conidial shuttling (corresponds with [Supplementary Fig S2D](#)).

1318

1319 **Supplementary Movie S5. Examples of shuttles of non-conidial particles.**

1320 Shuttles are of live calcofluor-stained conidia (blue) from a *Tg(mpx:EGFP)*  
1321 neutrophil (green) to a *Tg(mpeg1:Gal4FF)x(UAS-E1b:Eco.NfsB-mCherry)*  
1322 macrophage (red). Movies run in series. Movies are paused at the moment  
1323 of shuttling, with the point of transfer labelled (white arrow).

- 1324 a. Shuttle of zymosan particle (corresponds to [Fig 6C](#)).
- 1325 b. Efferocytosis (not a shuttle) of whole neutrophil laden with plastic beads  
1326 (corresponds to [Supplementary Fig S3](#)).
- 1327 c. Shuttle of  $\beta$ -glucan coated plastic beads (corresponds to [Fig 6D](#)).

1328

1329 **Supplementary Movie S6. Two examples of zymosan shuttles between**  
1330 **murine neutrophils and macrophages *in vitro*.**

1331 Shuttles of zymosan particles between murine neutrophils preloaded with  
1332 Alexa Fluor 488-labelled zymosan and adherent murine macrophages in an  
1333 *in vitro* assay. Photomicrographs are brightfield views overlaid with green

1334 fluorescence channel. White arrows in paused frames indicate the shuttle.

1335 Time stamps are provided in the corresponding [Fig 7](#) stills.

1336 a. Shuttle (arrowed) (corresponds with [Fig 7A](#)).

1337 b. Shuttle (arrowed) (corresponds with [Fig 7B](#)).

1338

Donor Neutrophil

Transfer

Recipient Macrophage

## A Standard shuttle of single conidium

shuttle #7

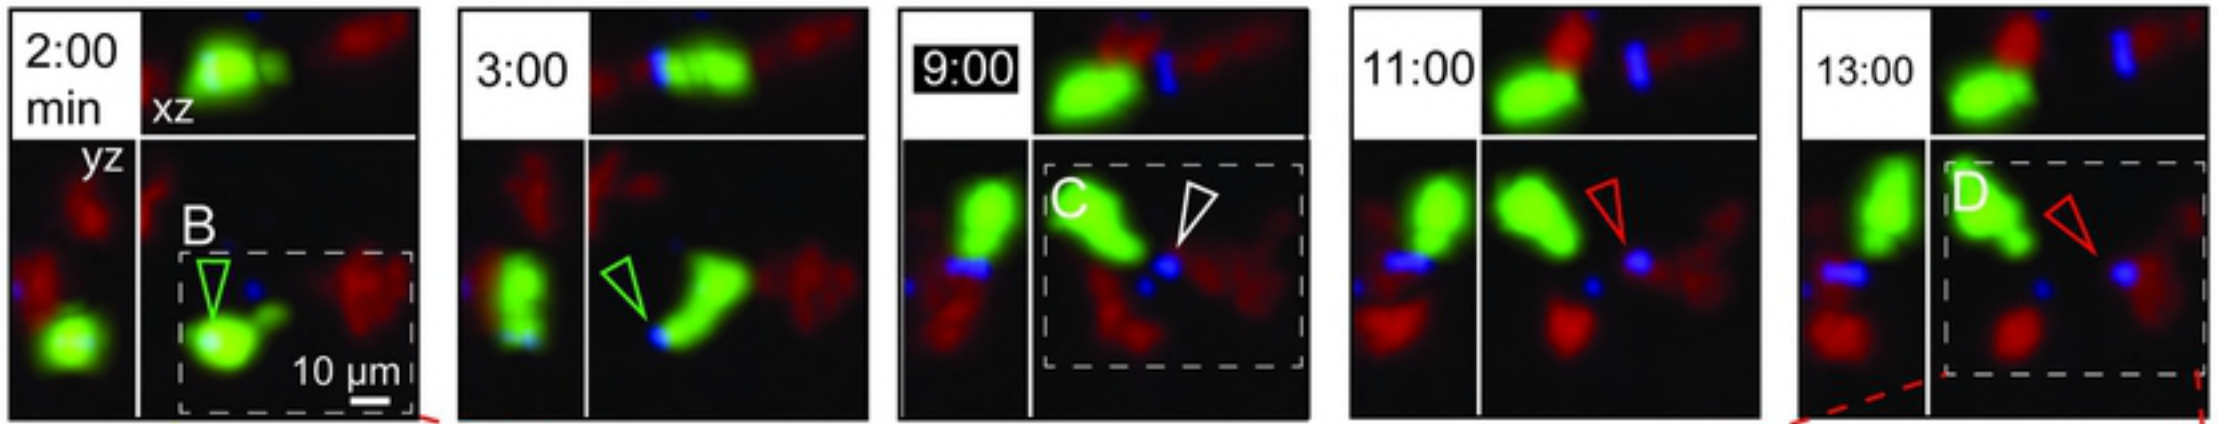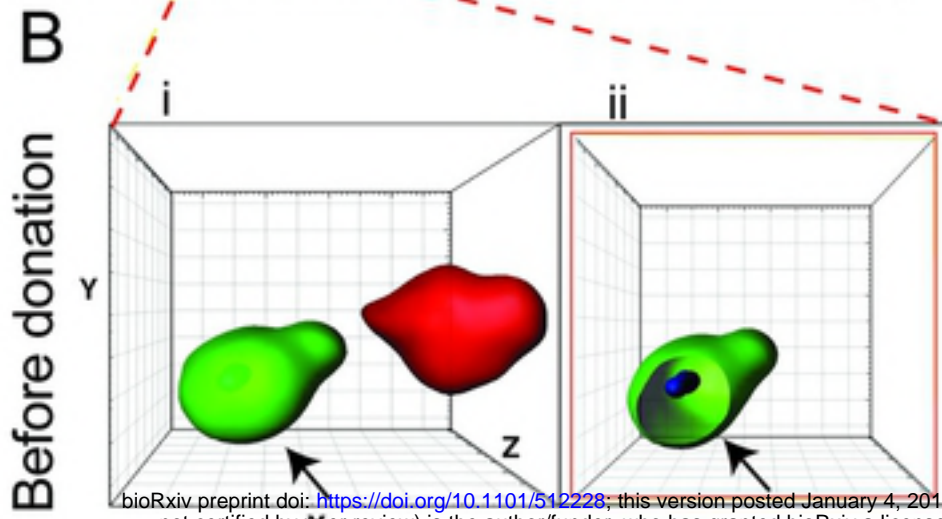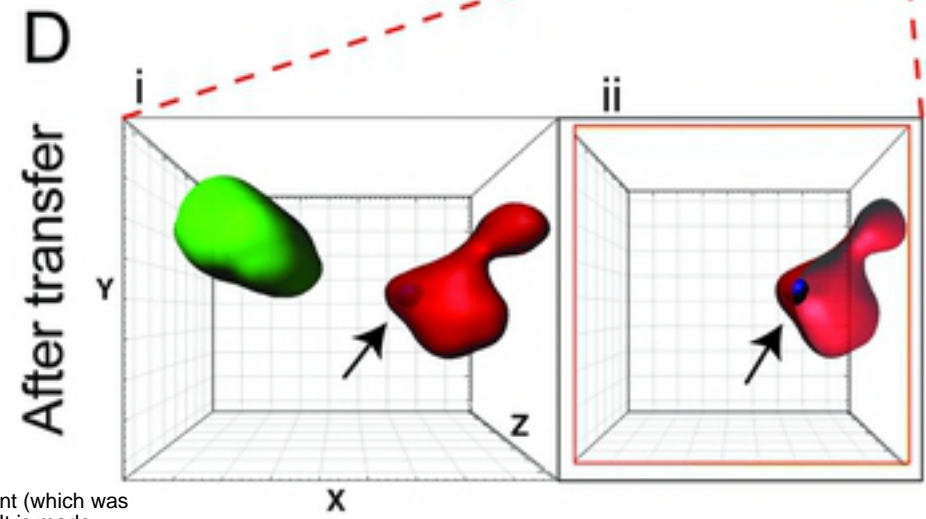

bioRxiv preprint doi: <https://doi.org/10.1101/512228>; this version posted January 4, 2019. The copyright holder for this preprint (which was not certified by peer review) is the author/funder, who has granted bioRxiv a license to display the preprint in perpetuity. It is made available under aCC-BY 4.0 International license.

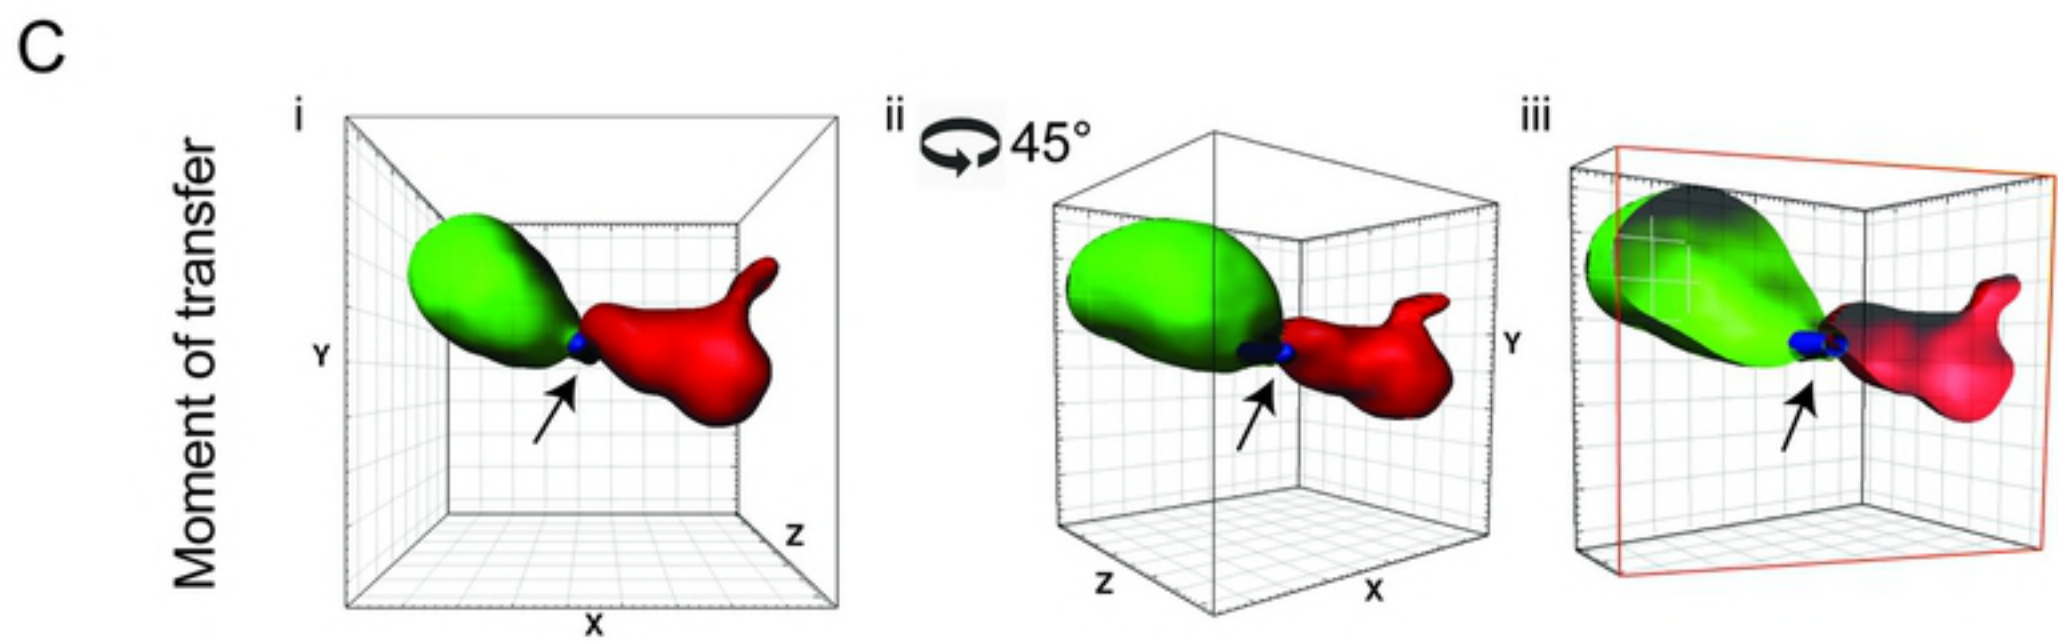

## E. Shuttle with tethered recipient macrophage

shuttle #43

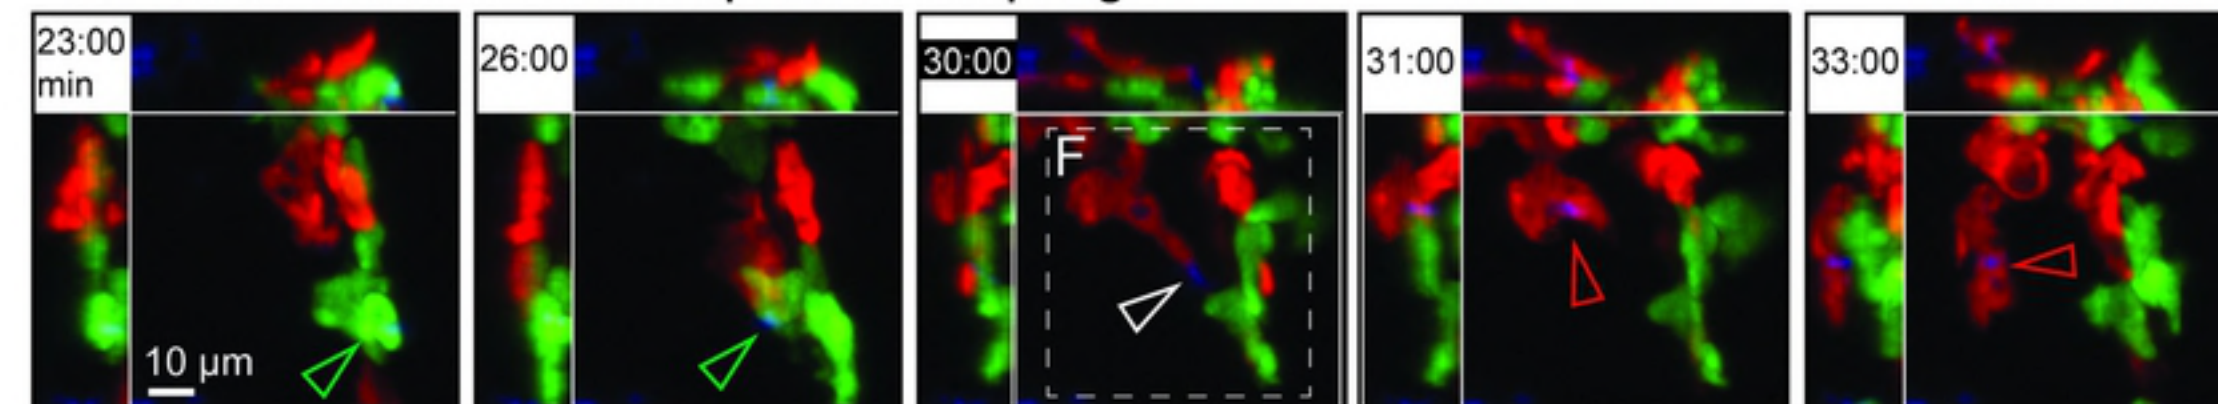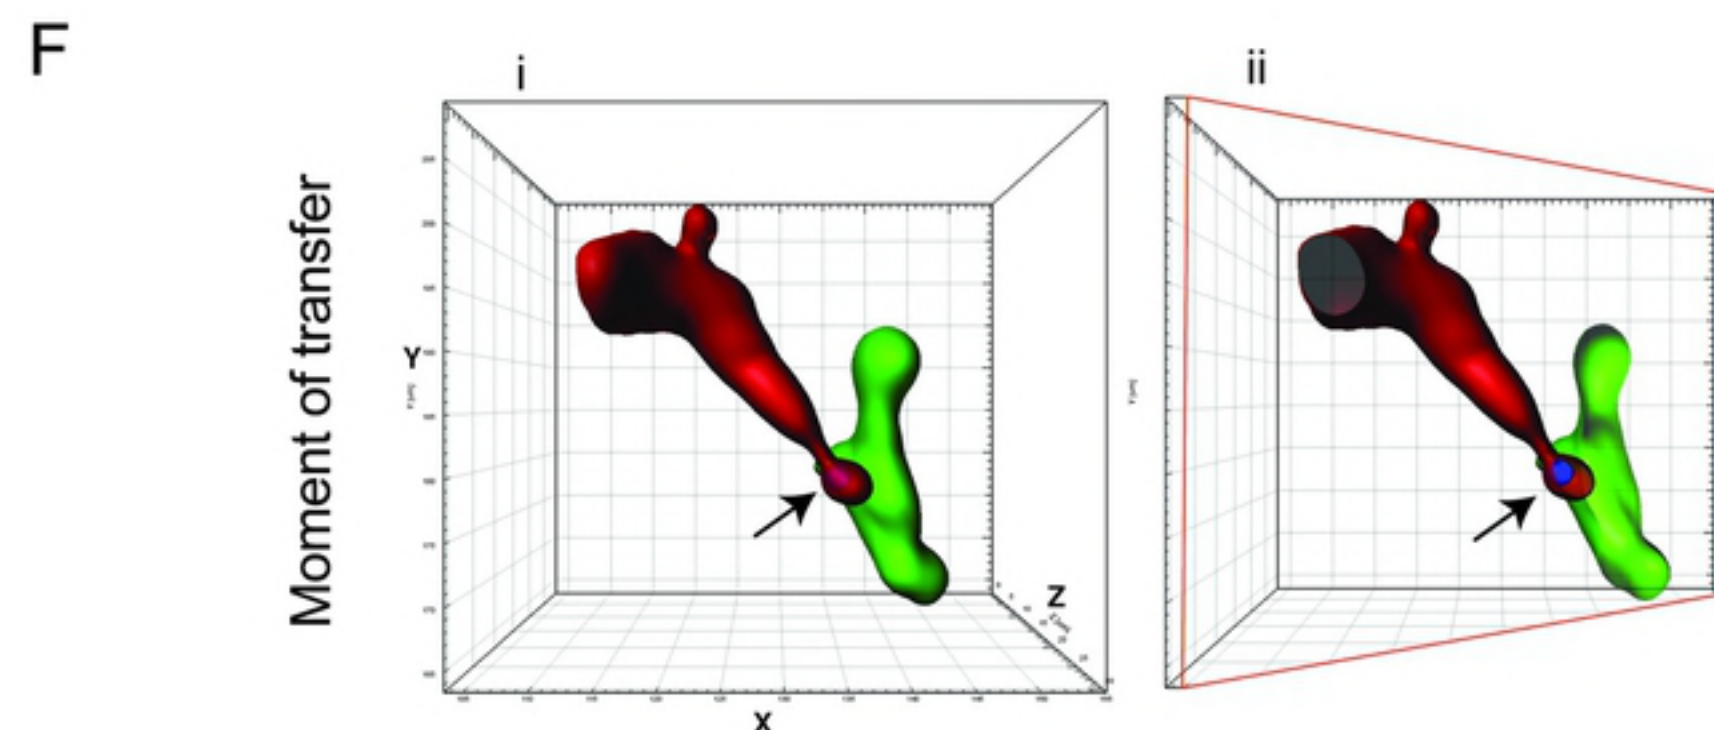

Figure 1

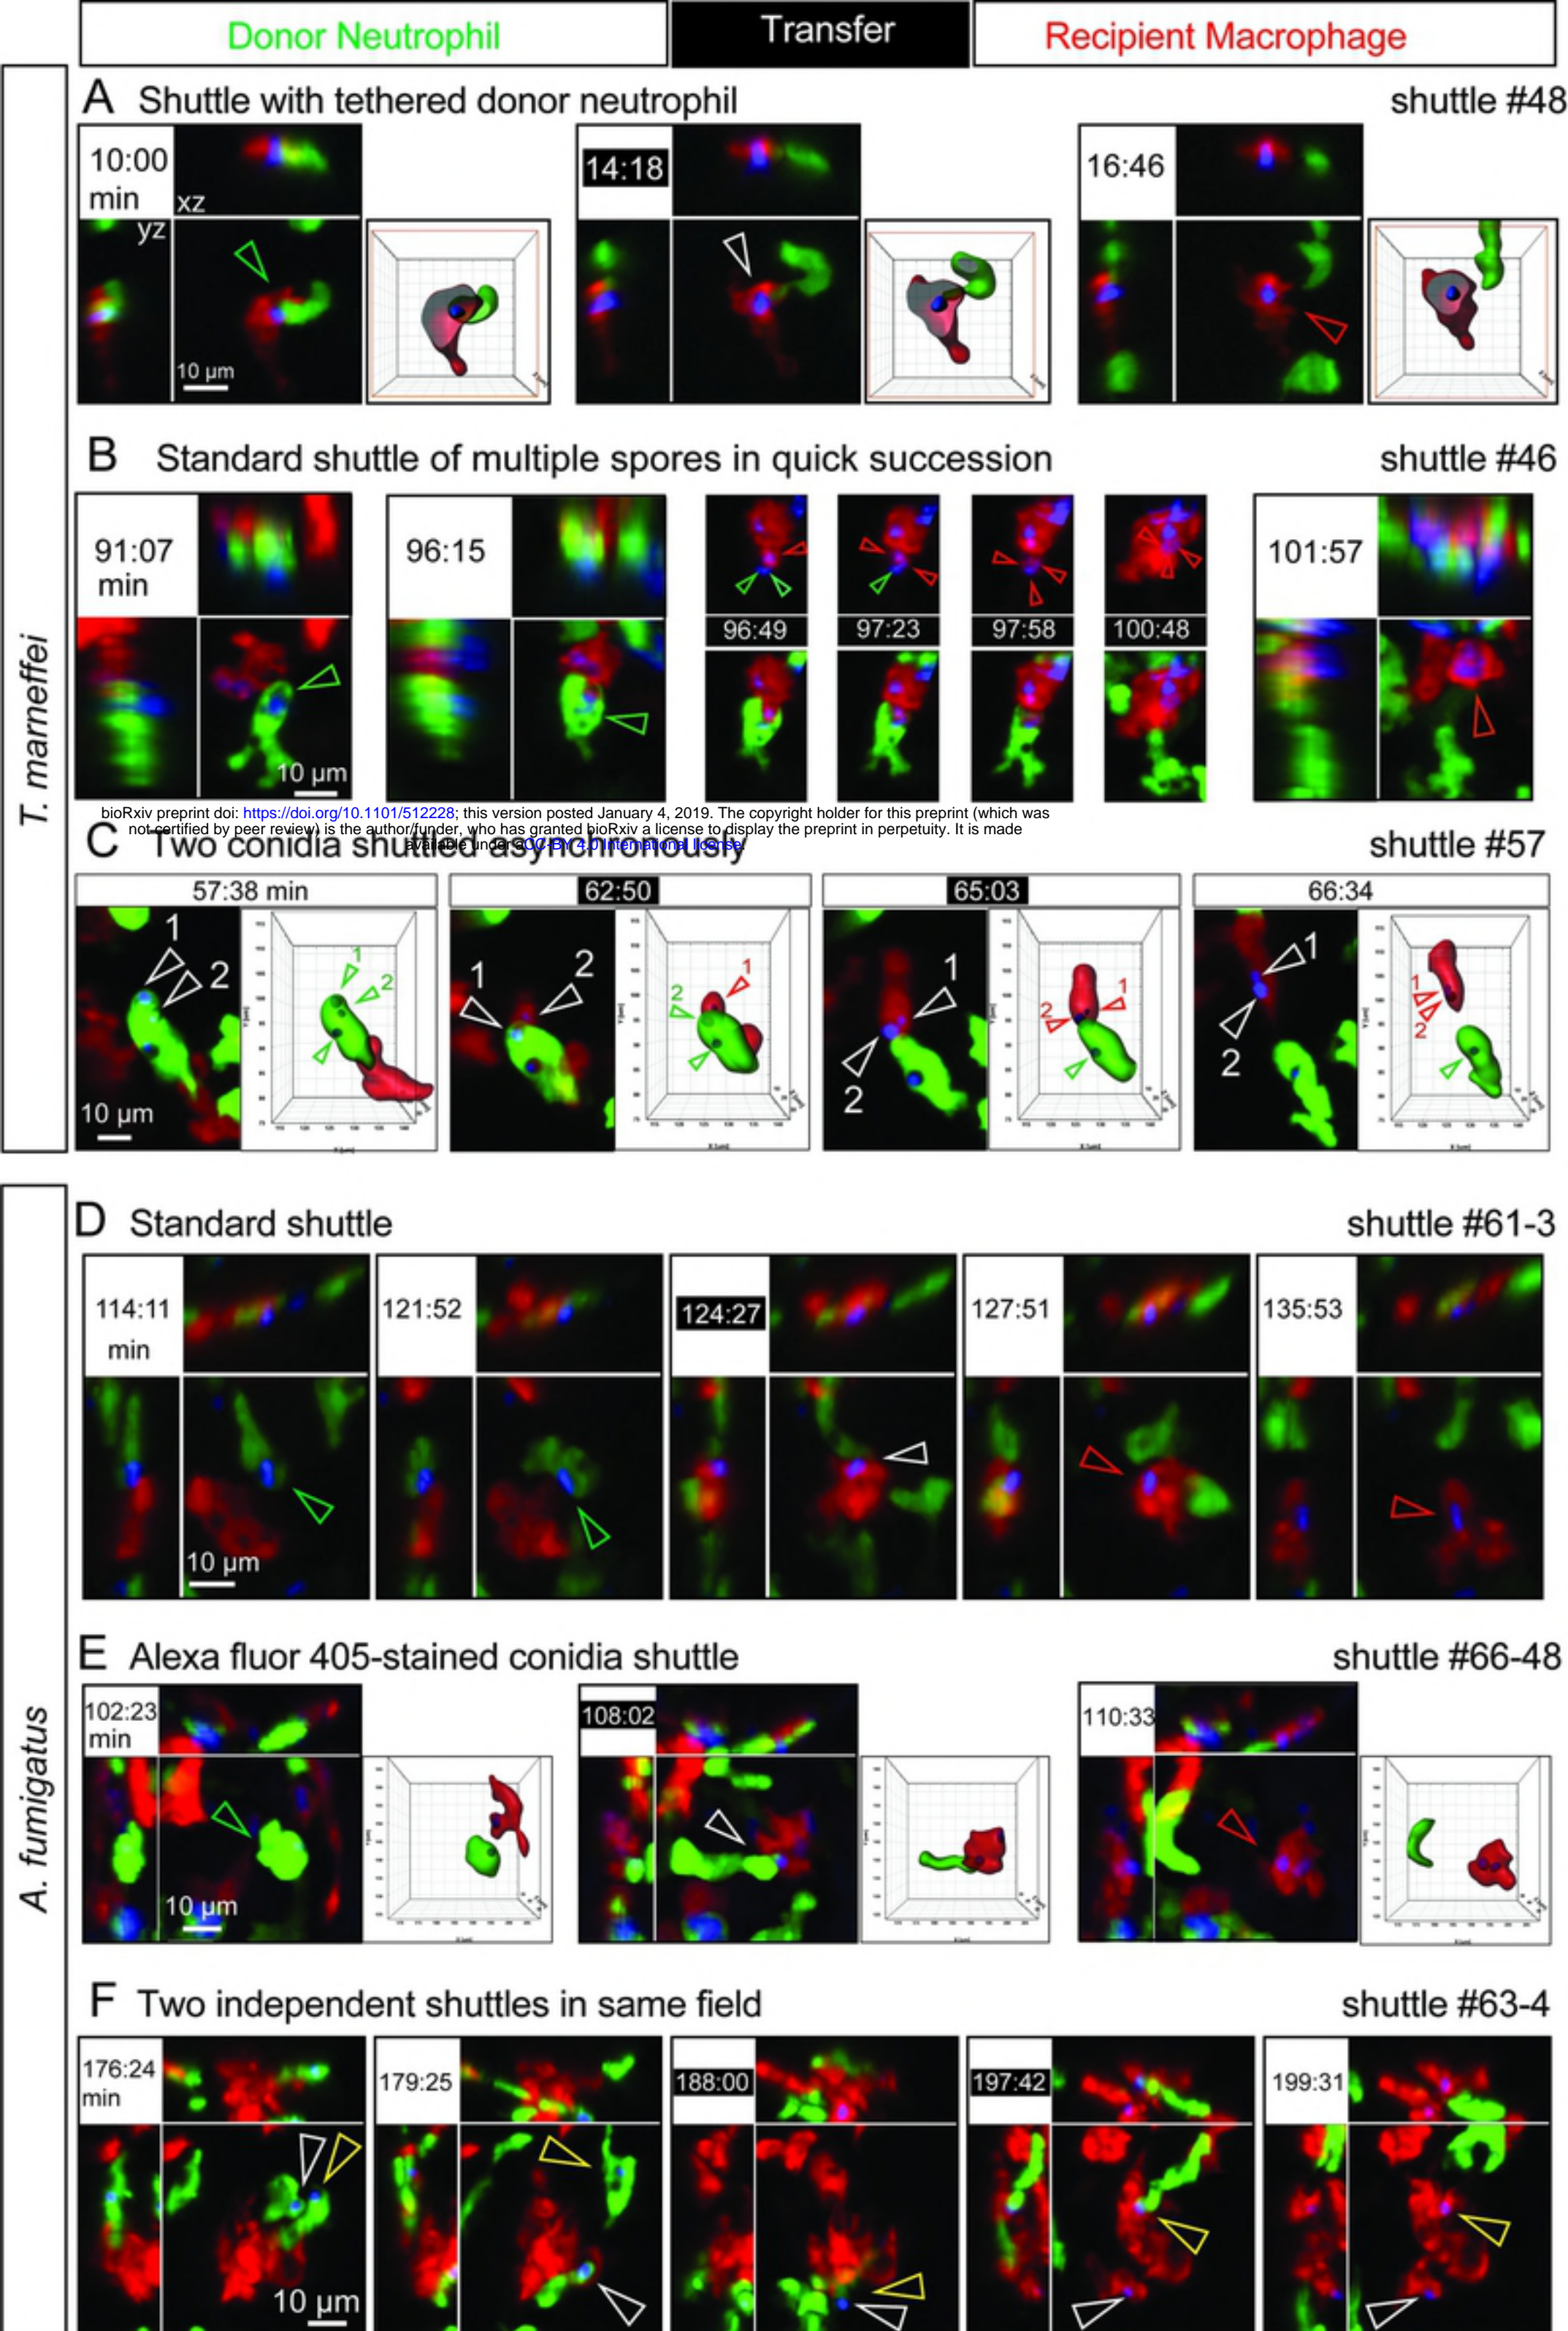

Figure 2

# A One of two spores shuttled

*Tg(mpeg1:mCherryCaaX/mpx:EGFPCaaX)/Calcofluor*

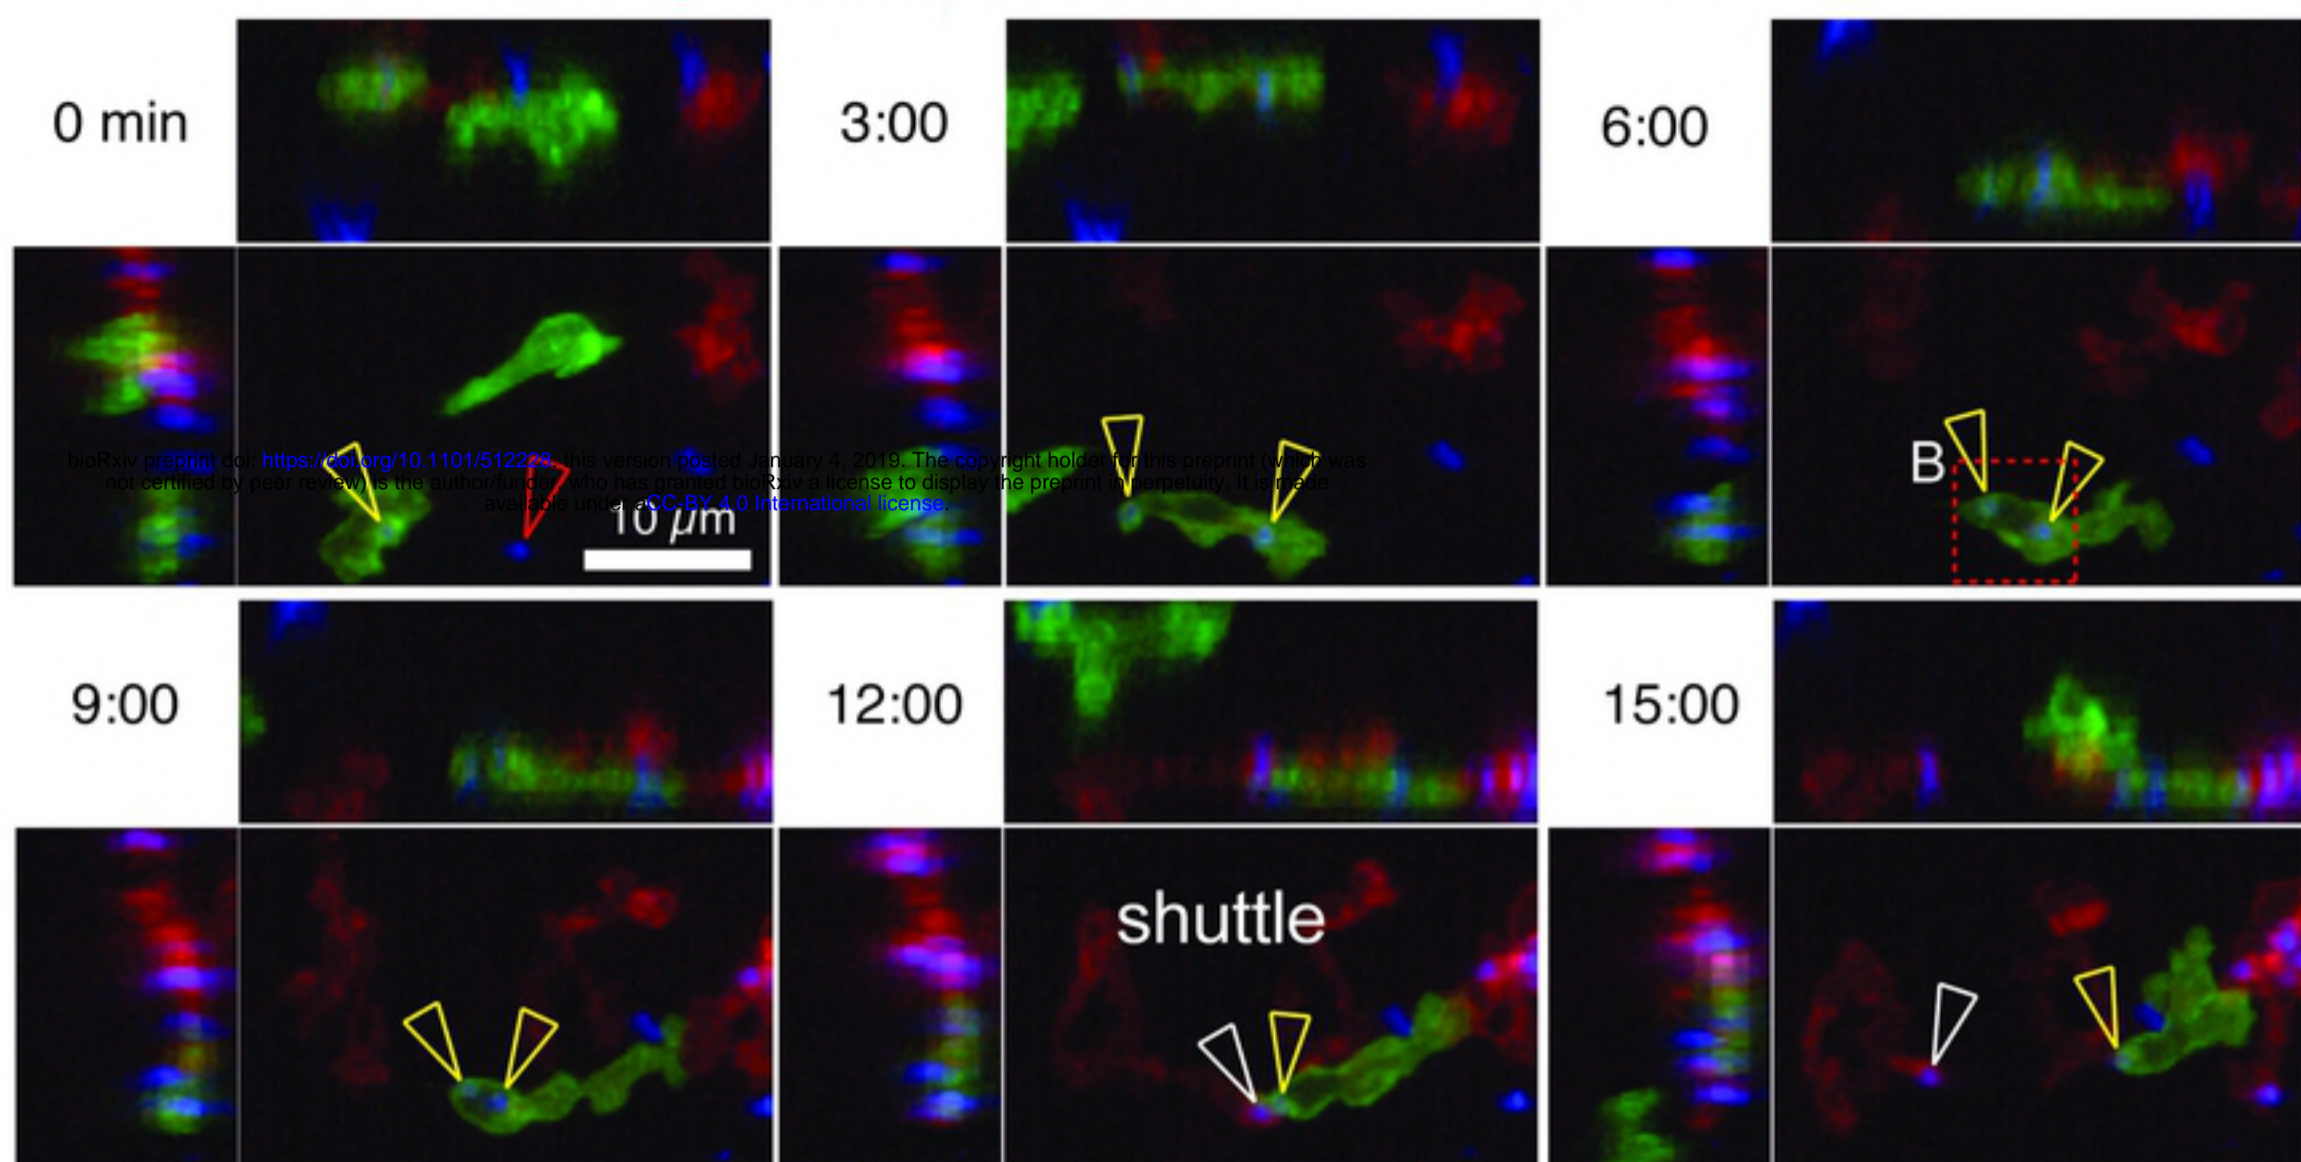

## B Donor neutrophil

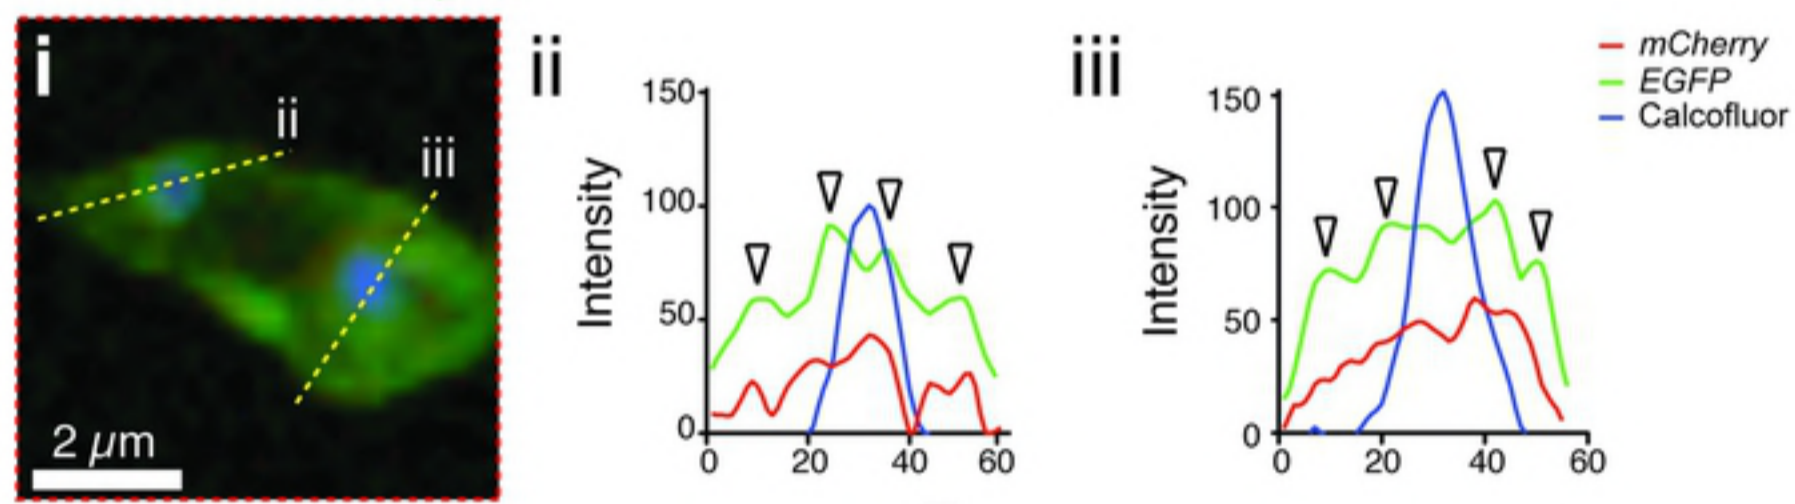

## C Recipient macrophage

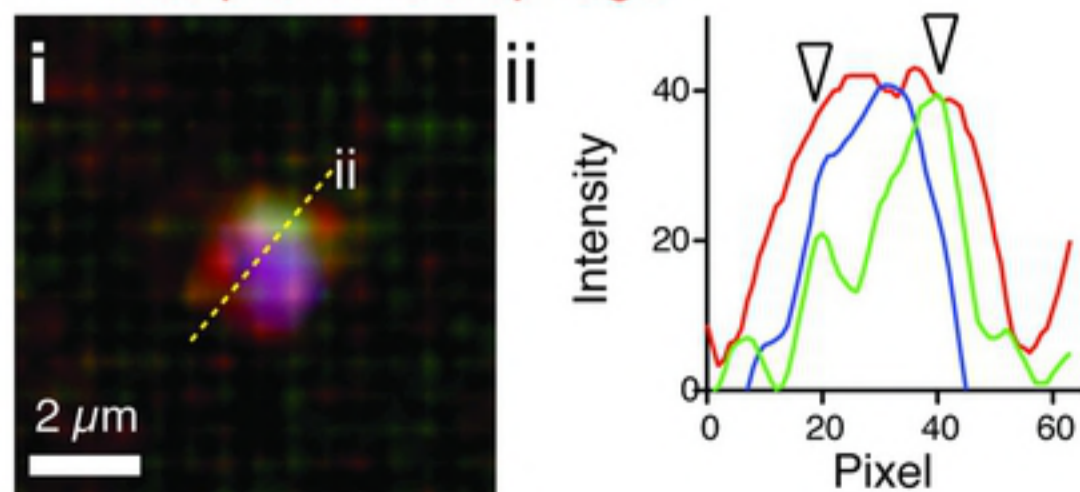

## D Recipient macrophage

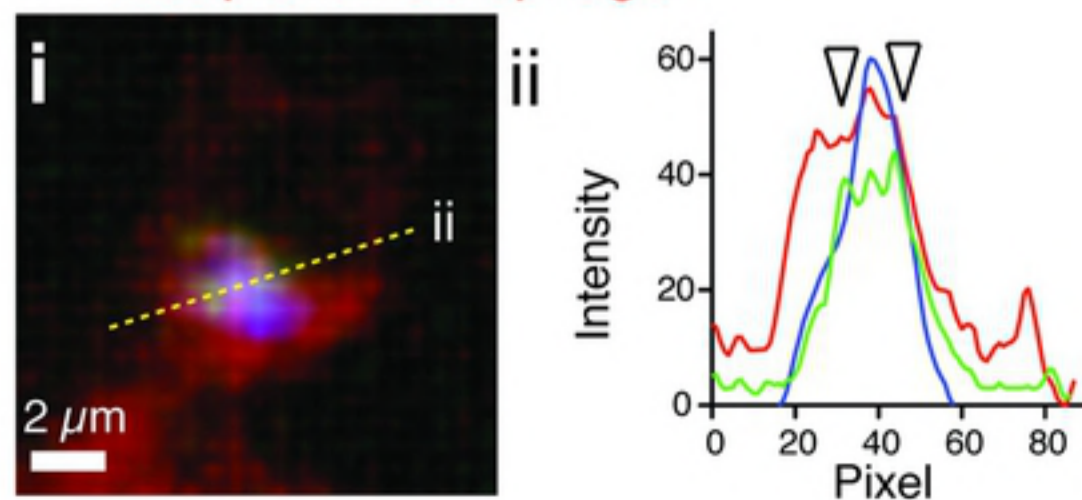

Figure 3

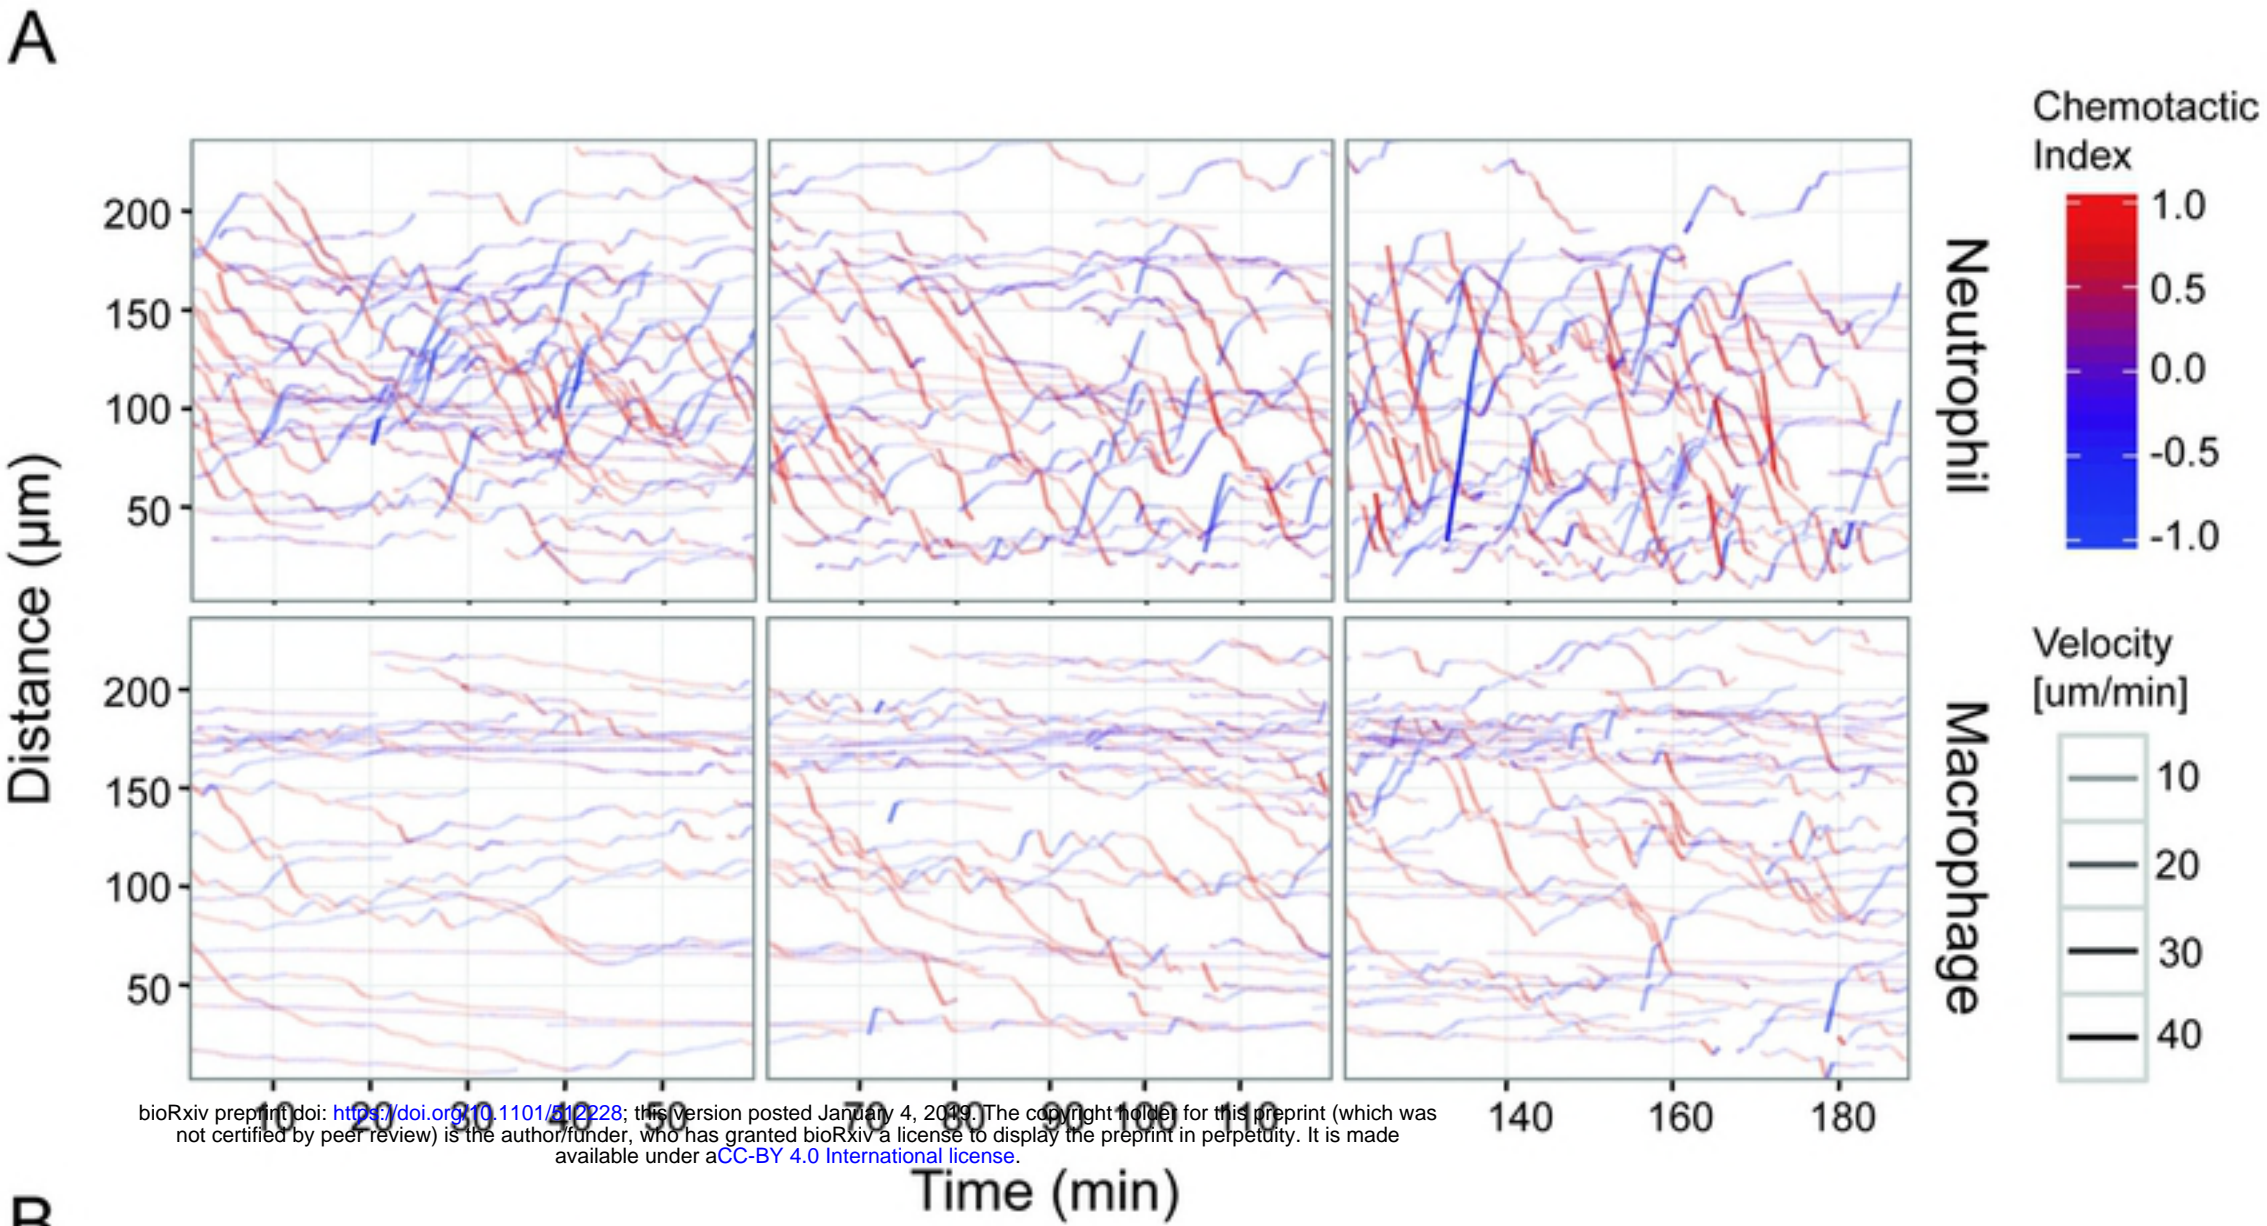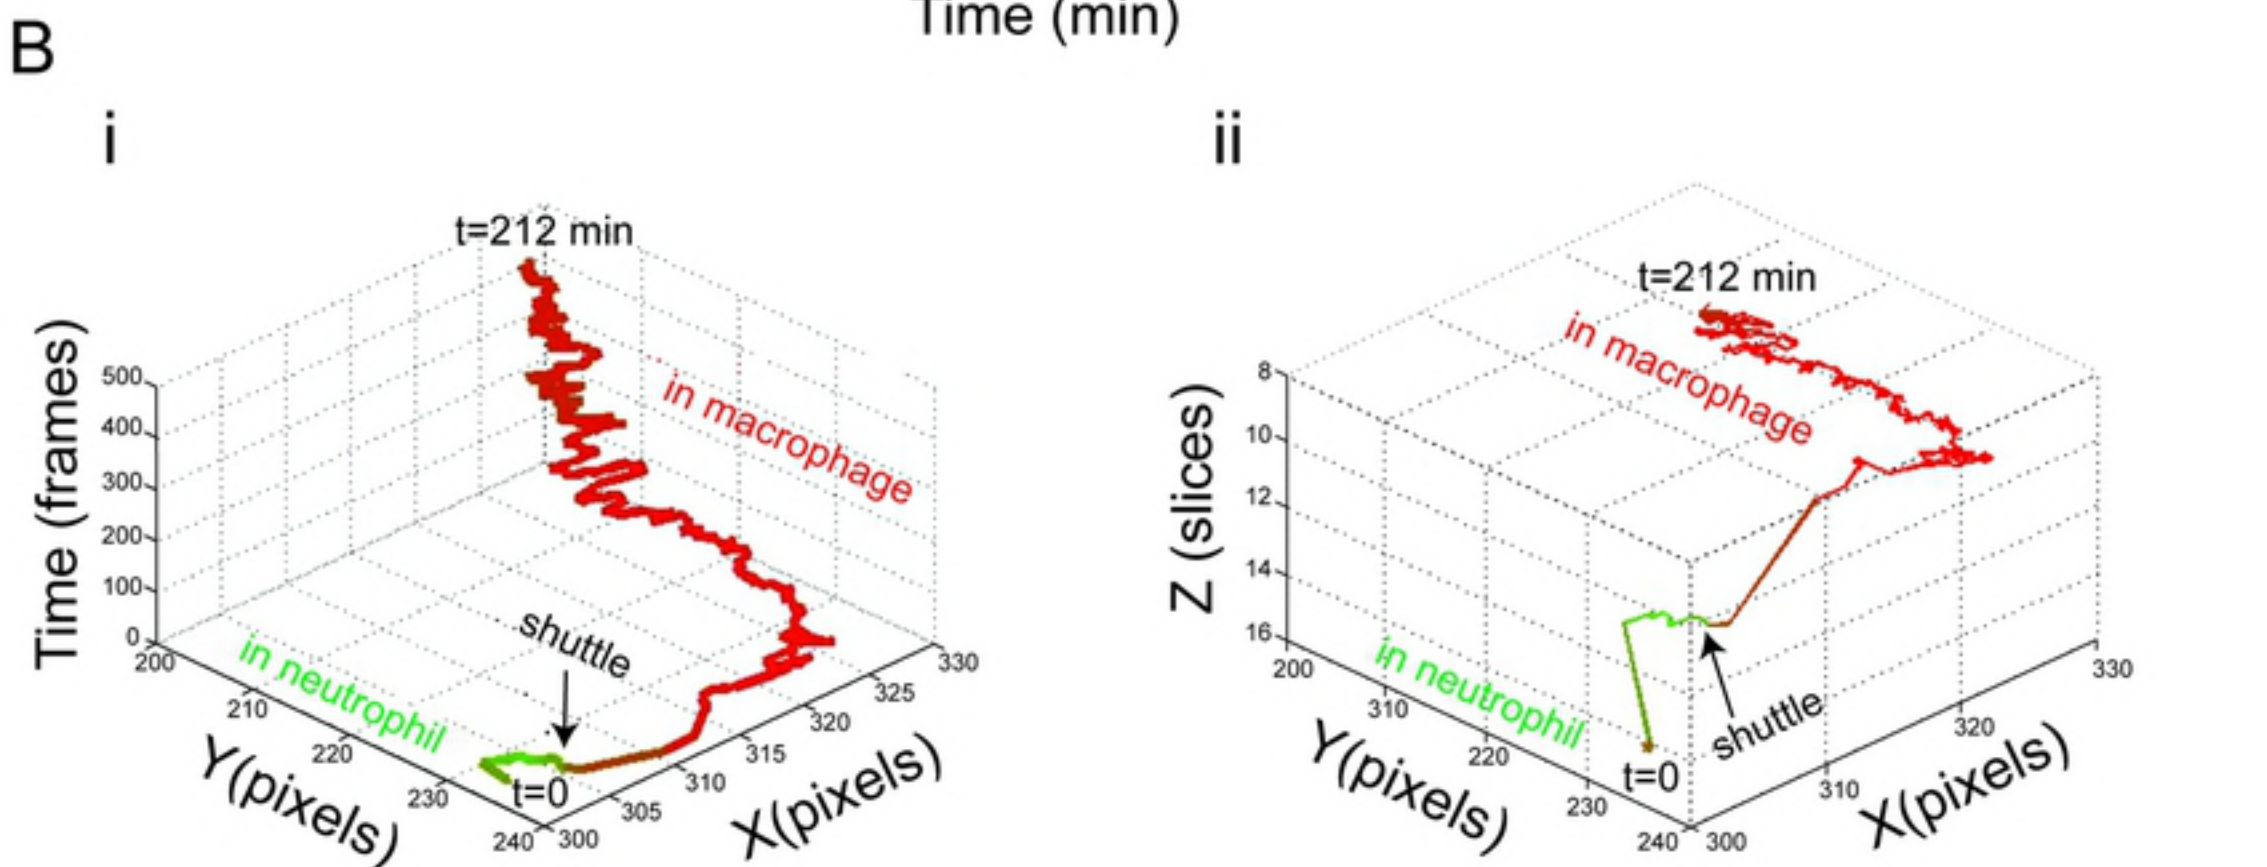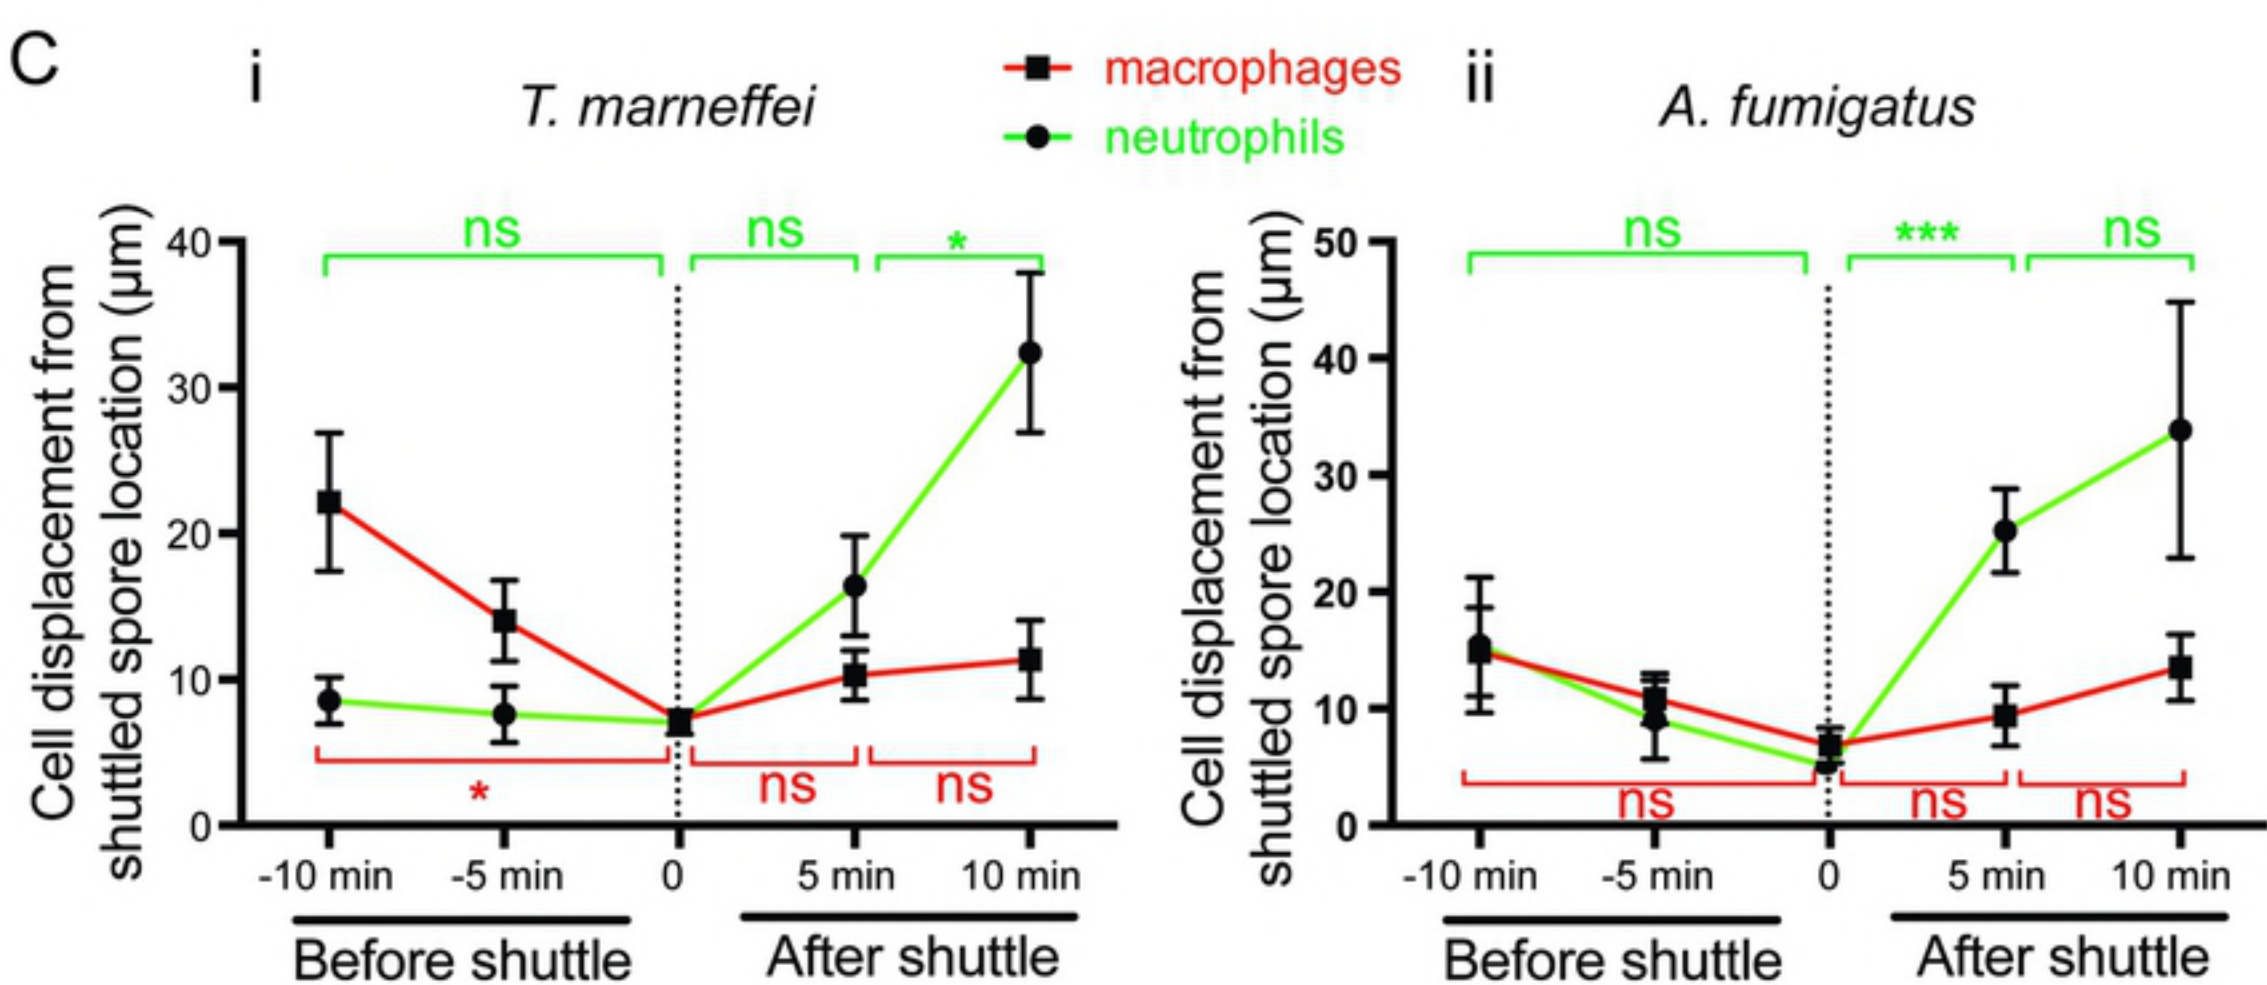

Figure 4

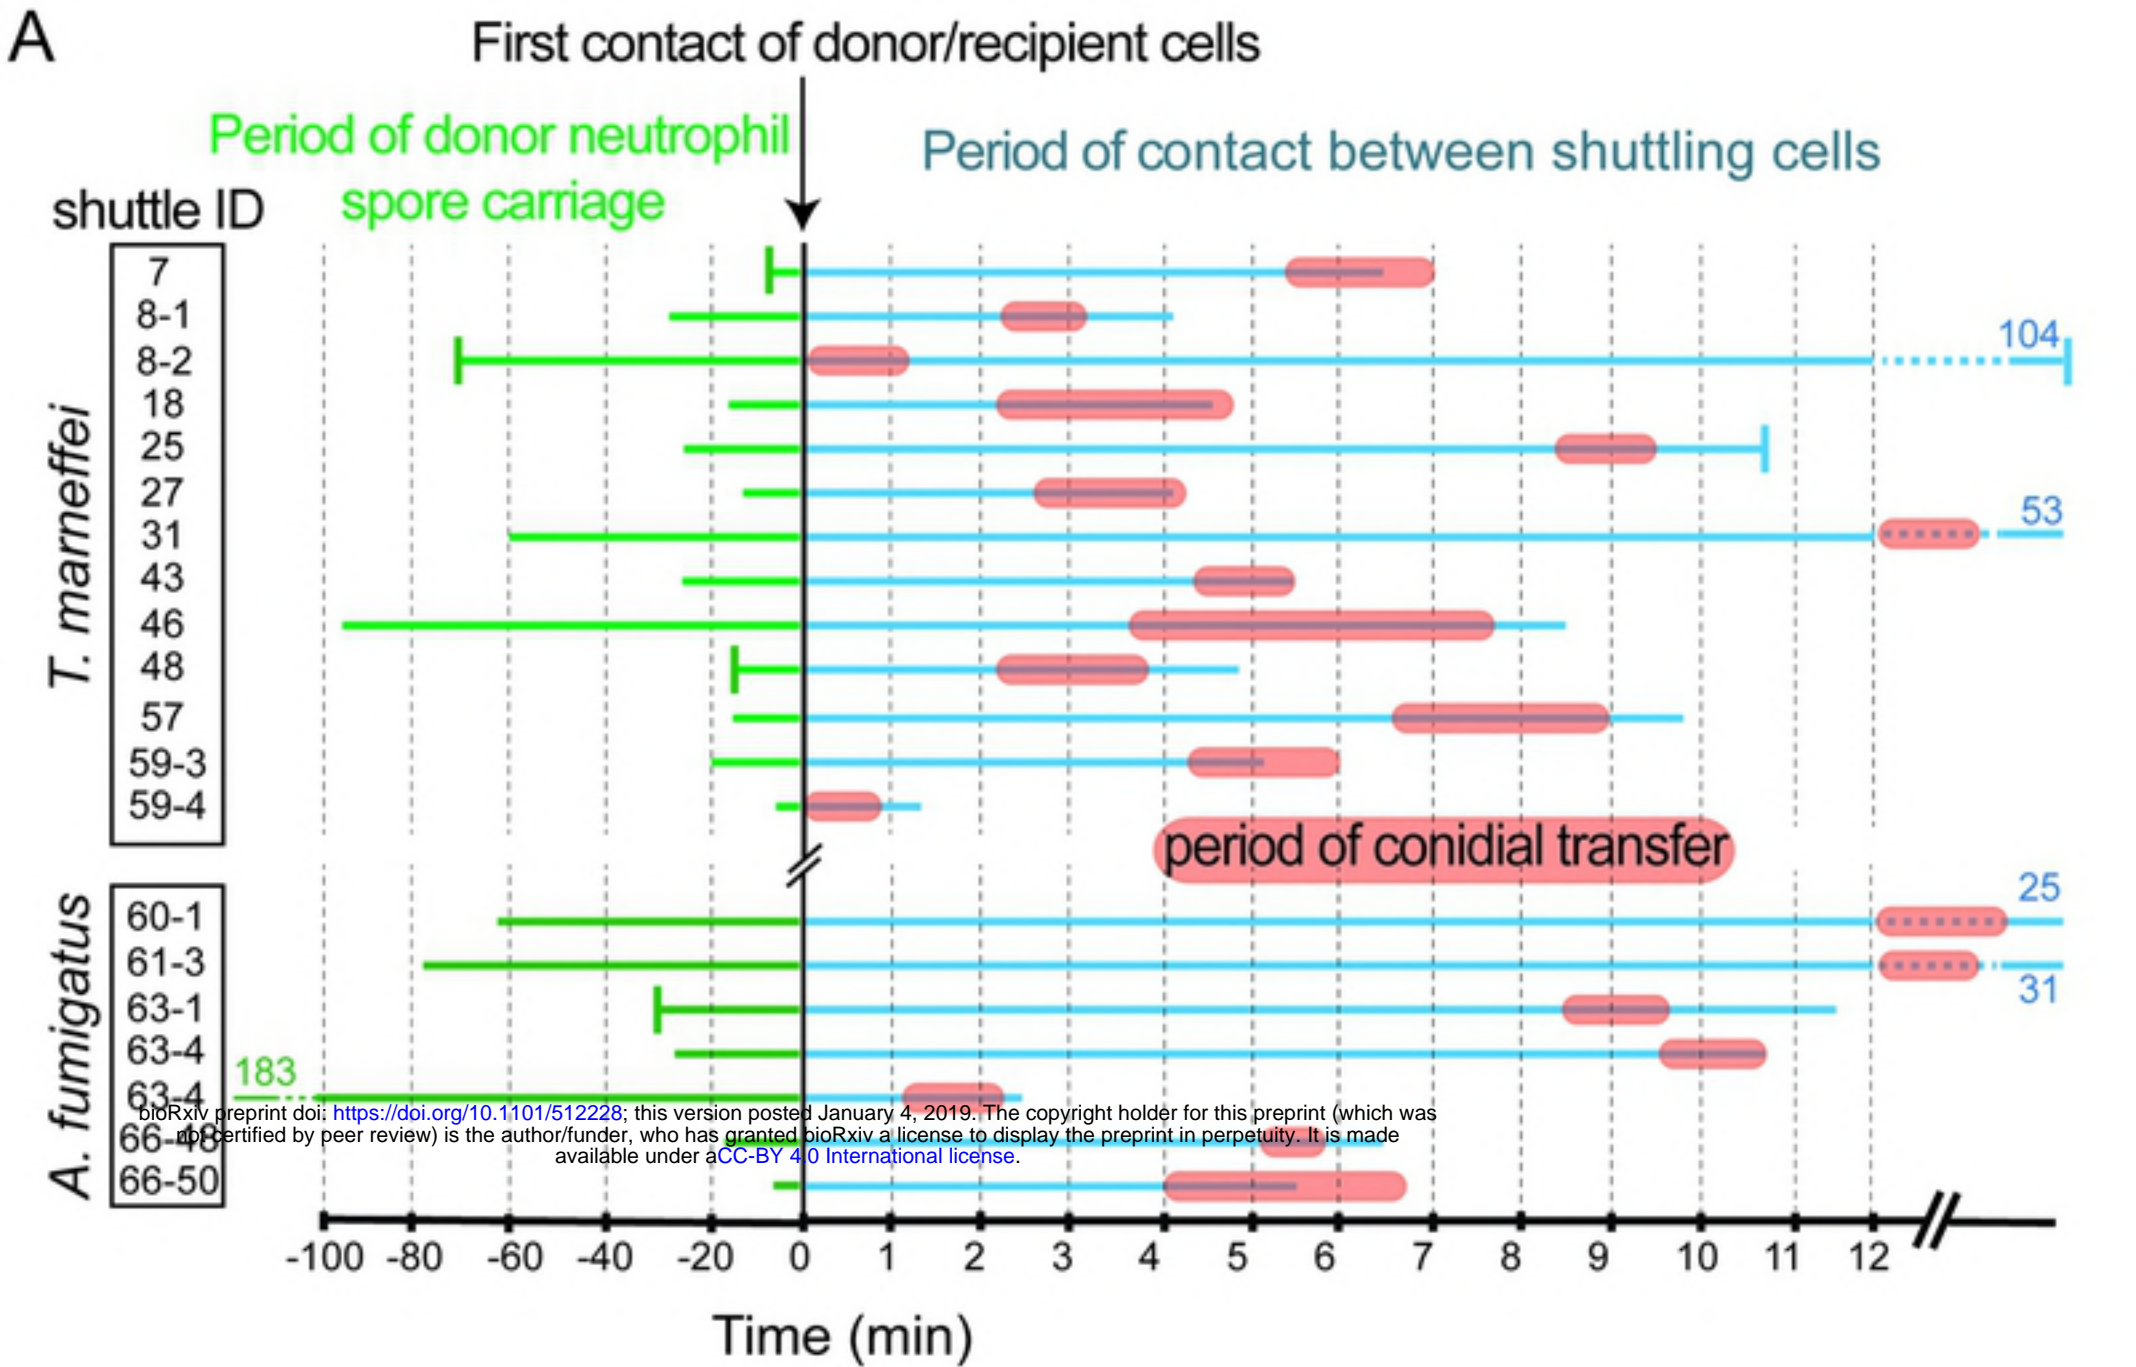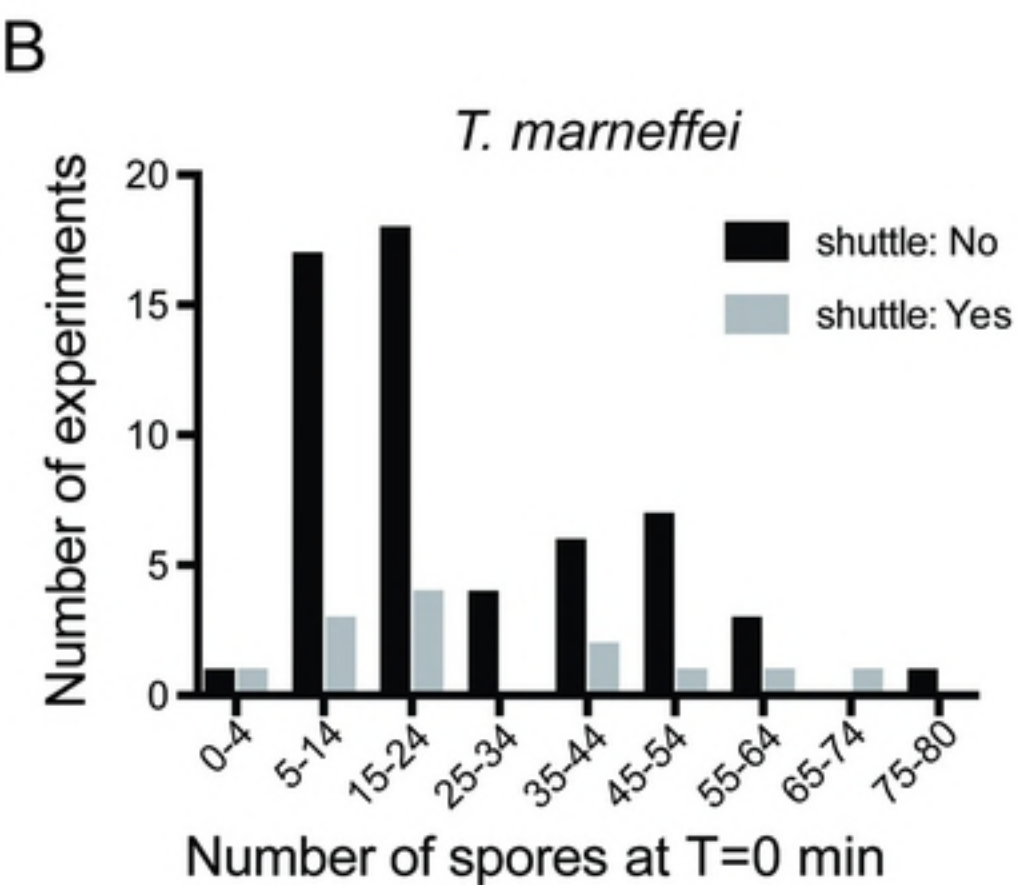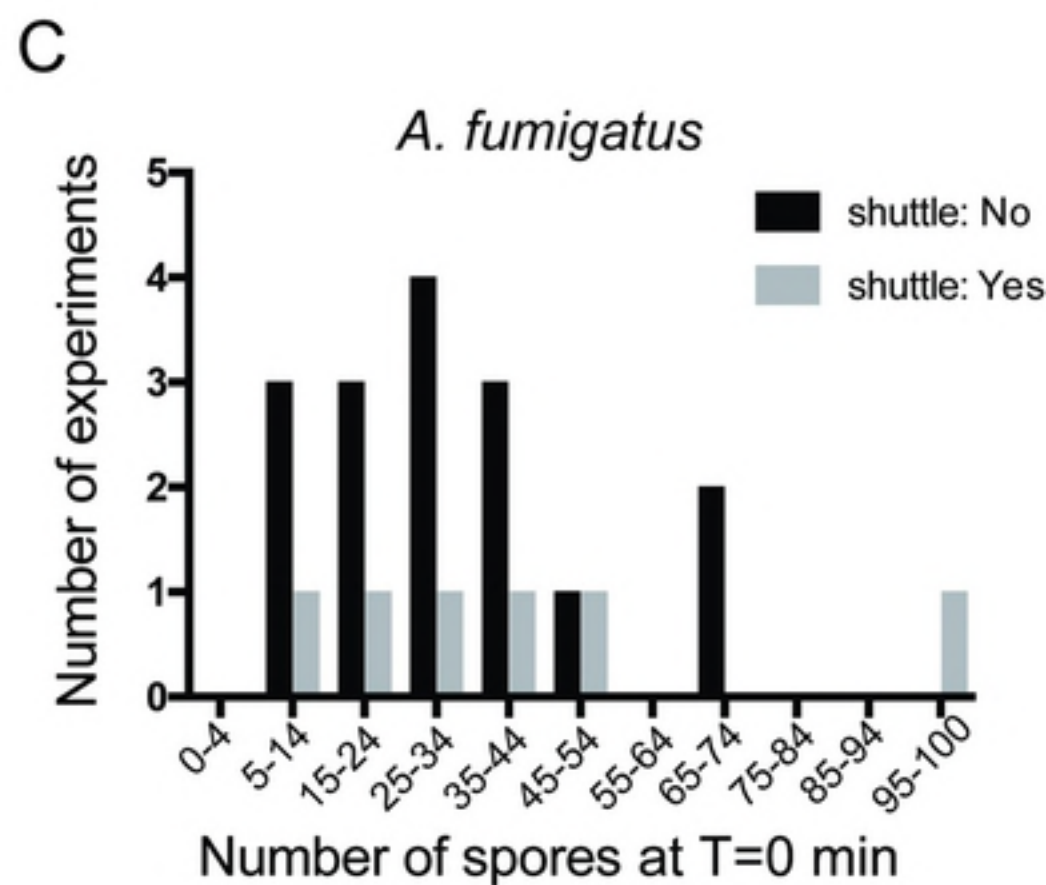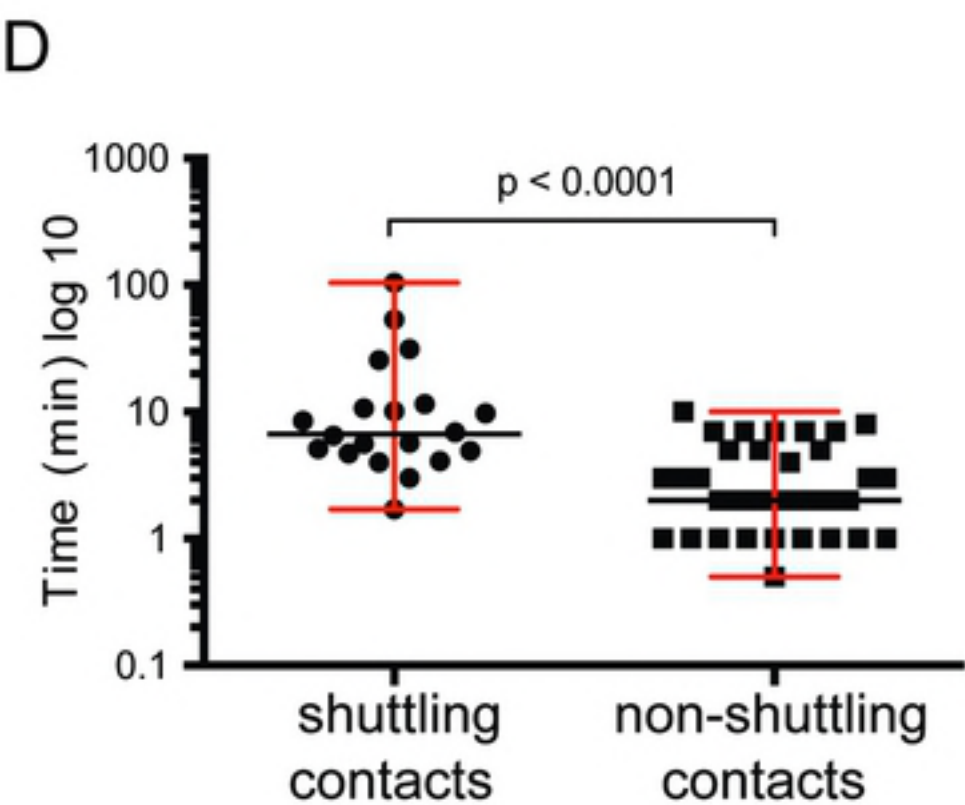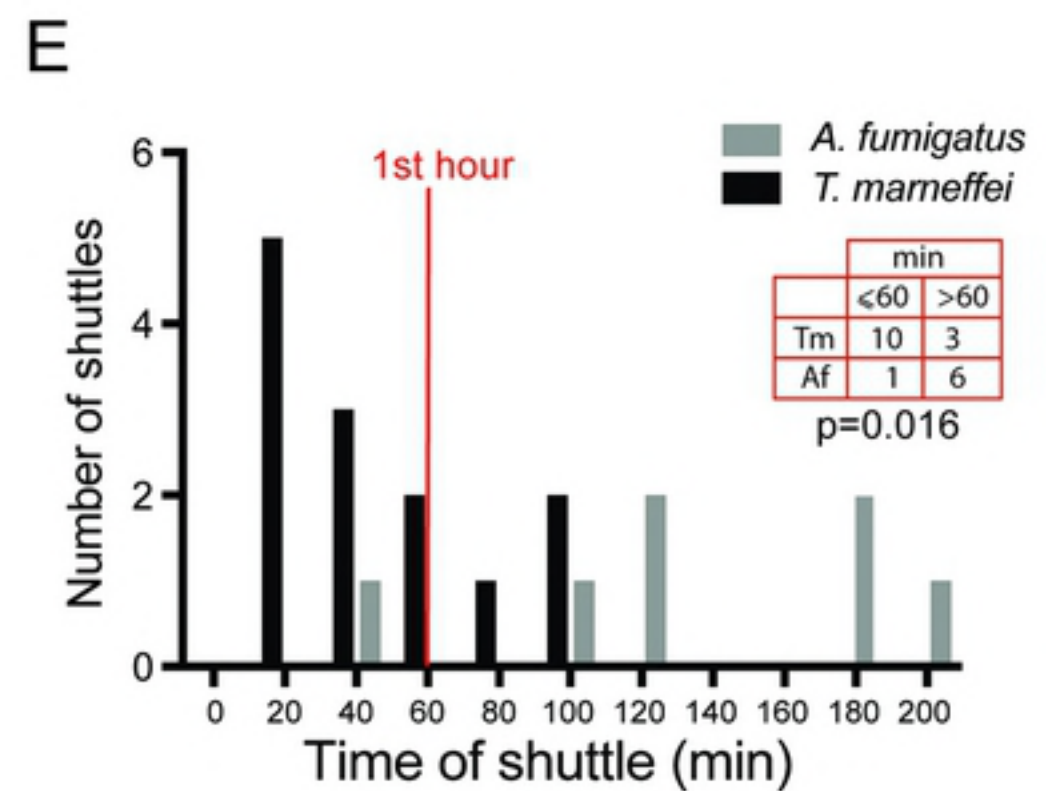

Figure 5

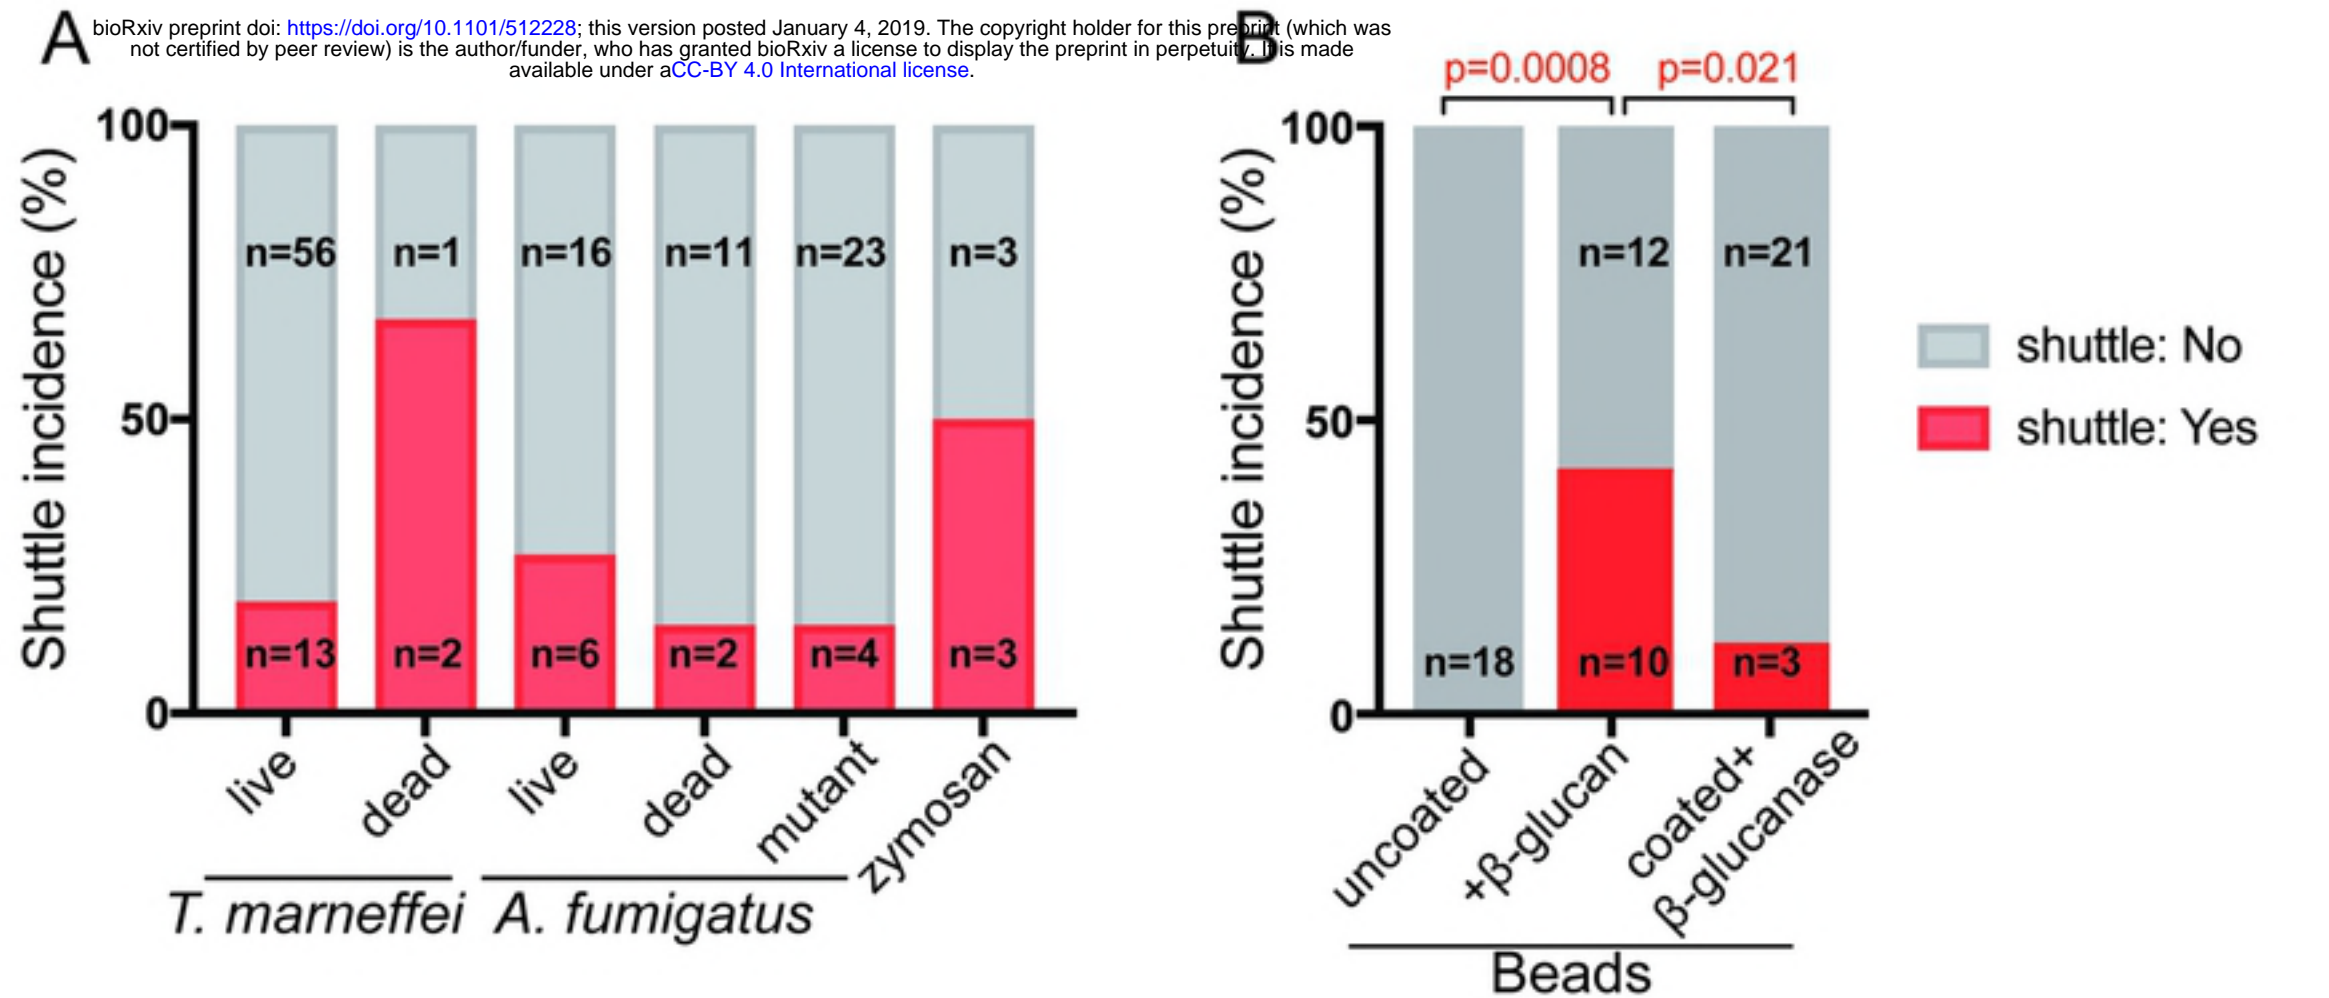

**C Zymosan**

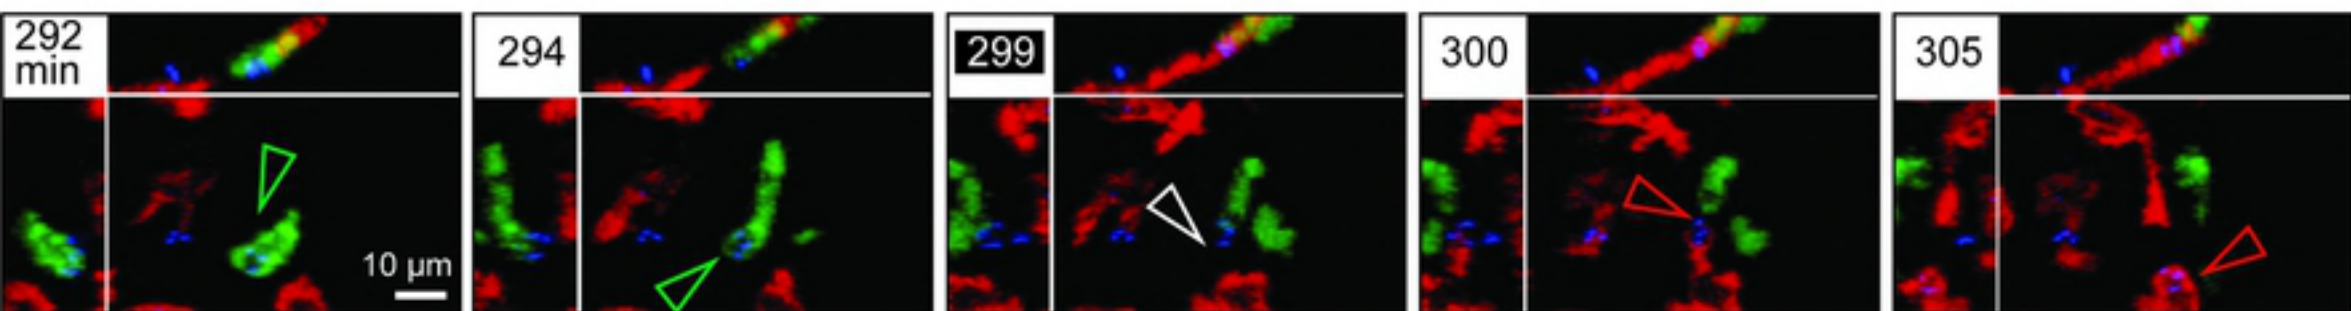

**D β-glucan coated beads**

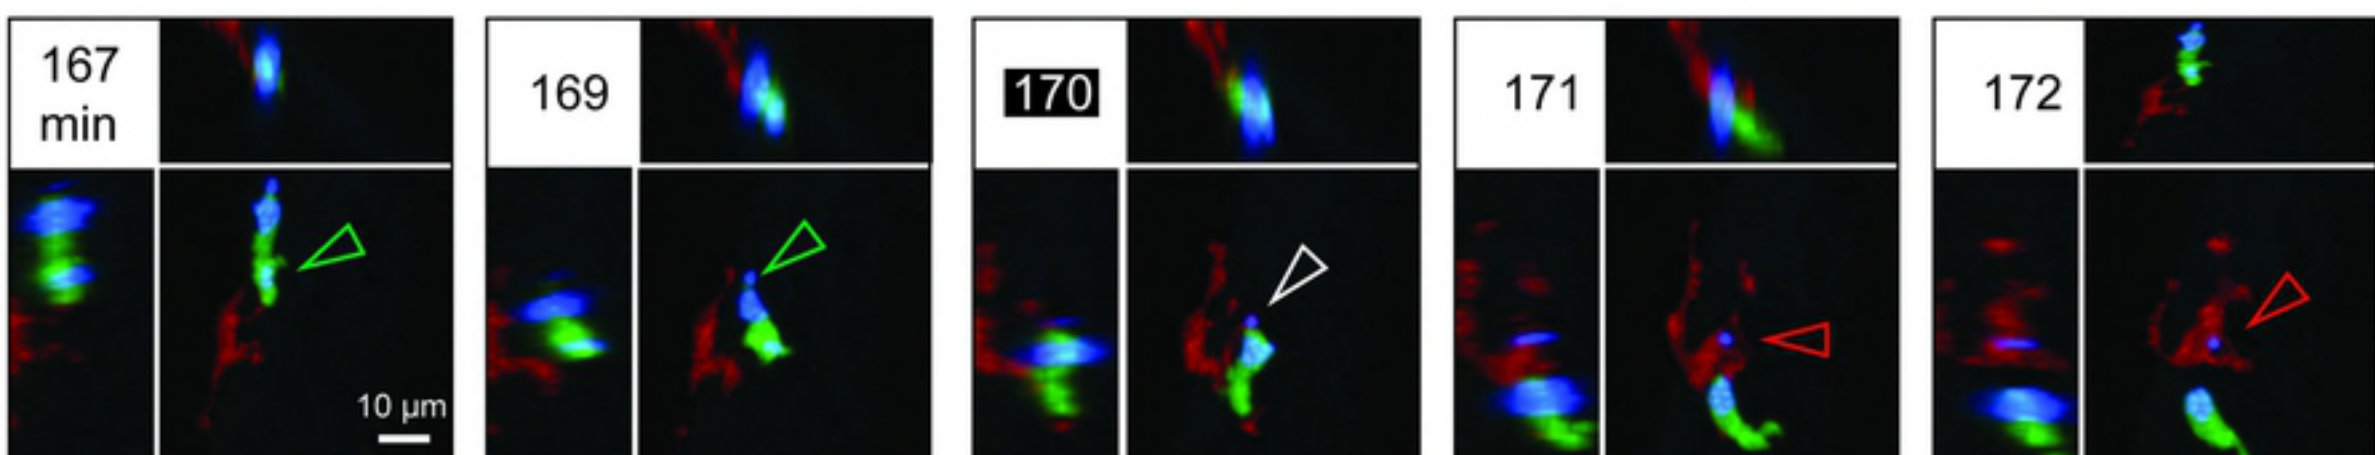

Figure 6



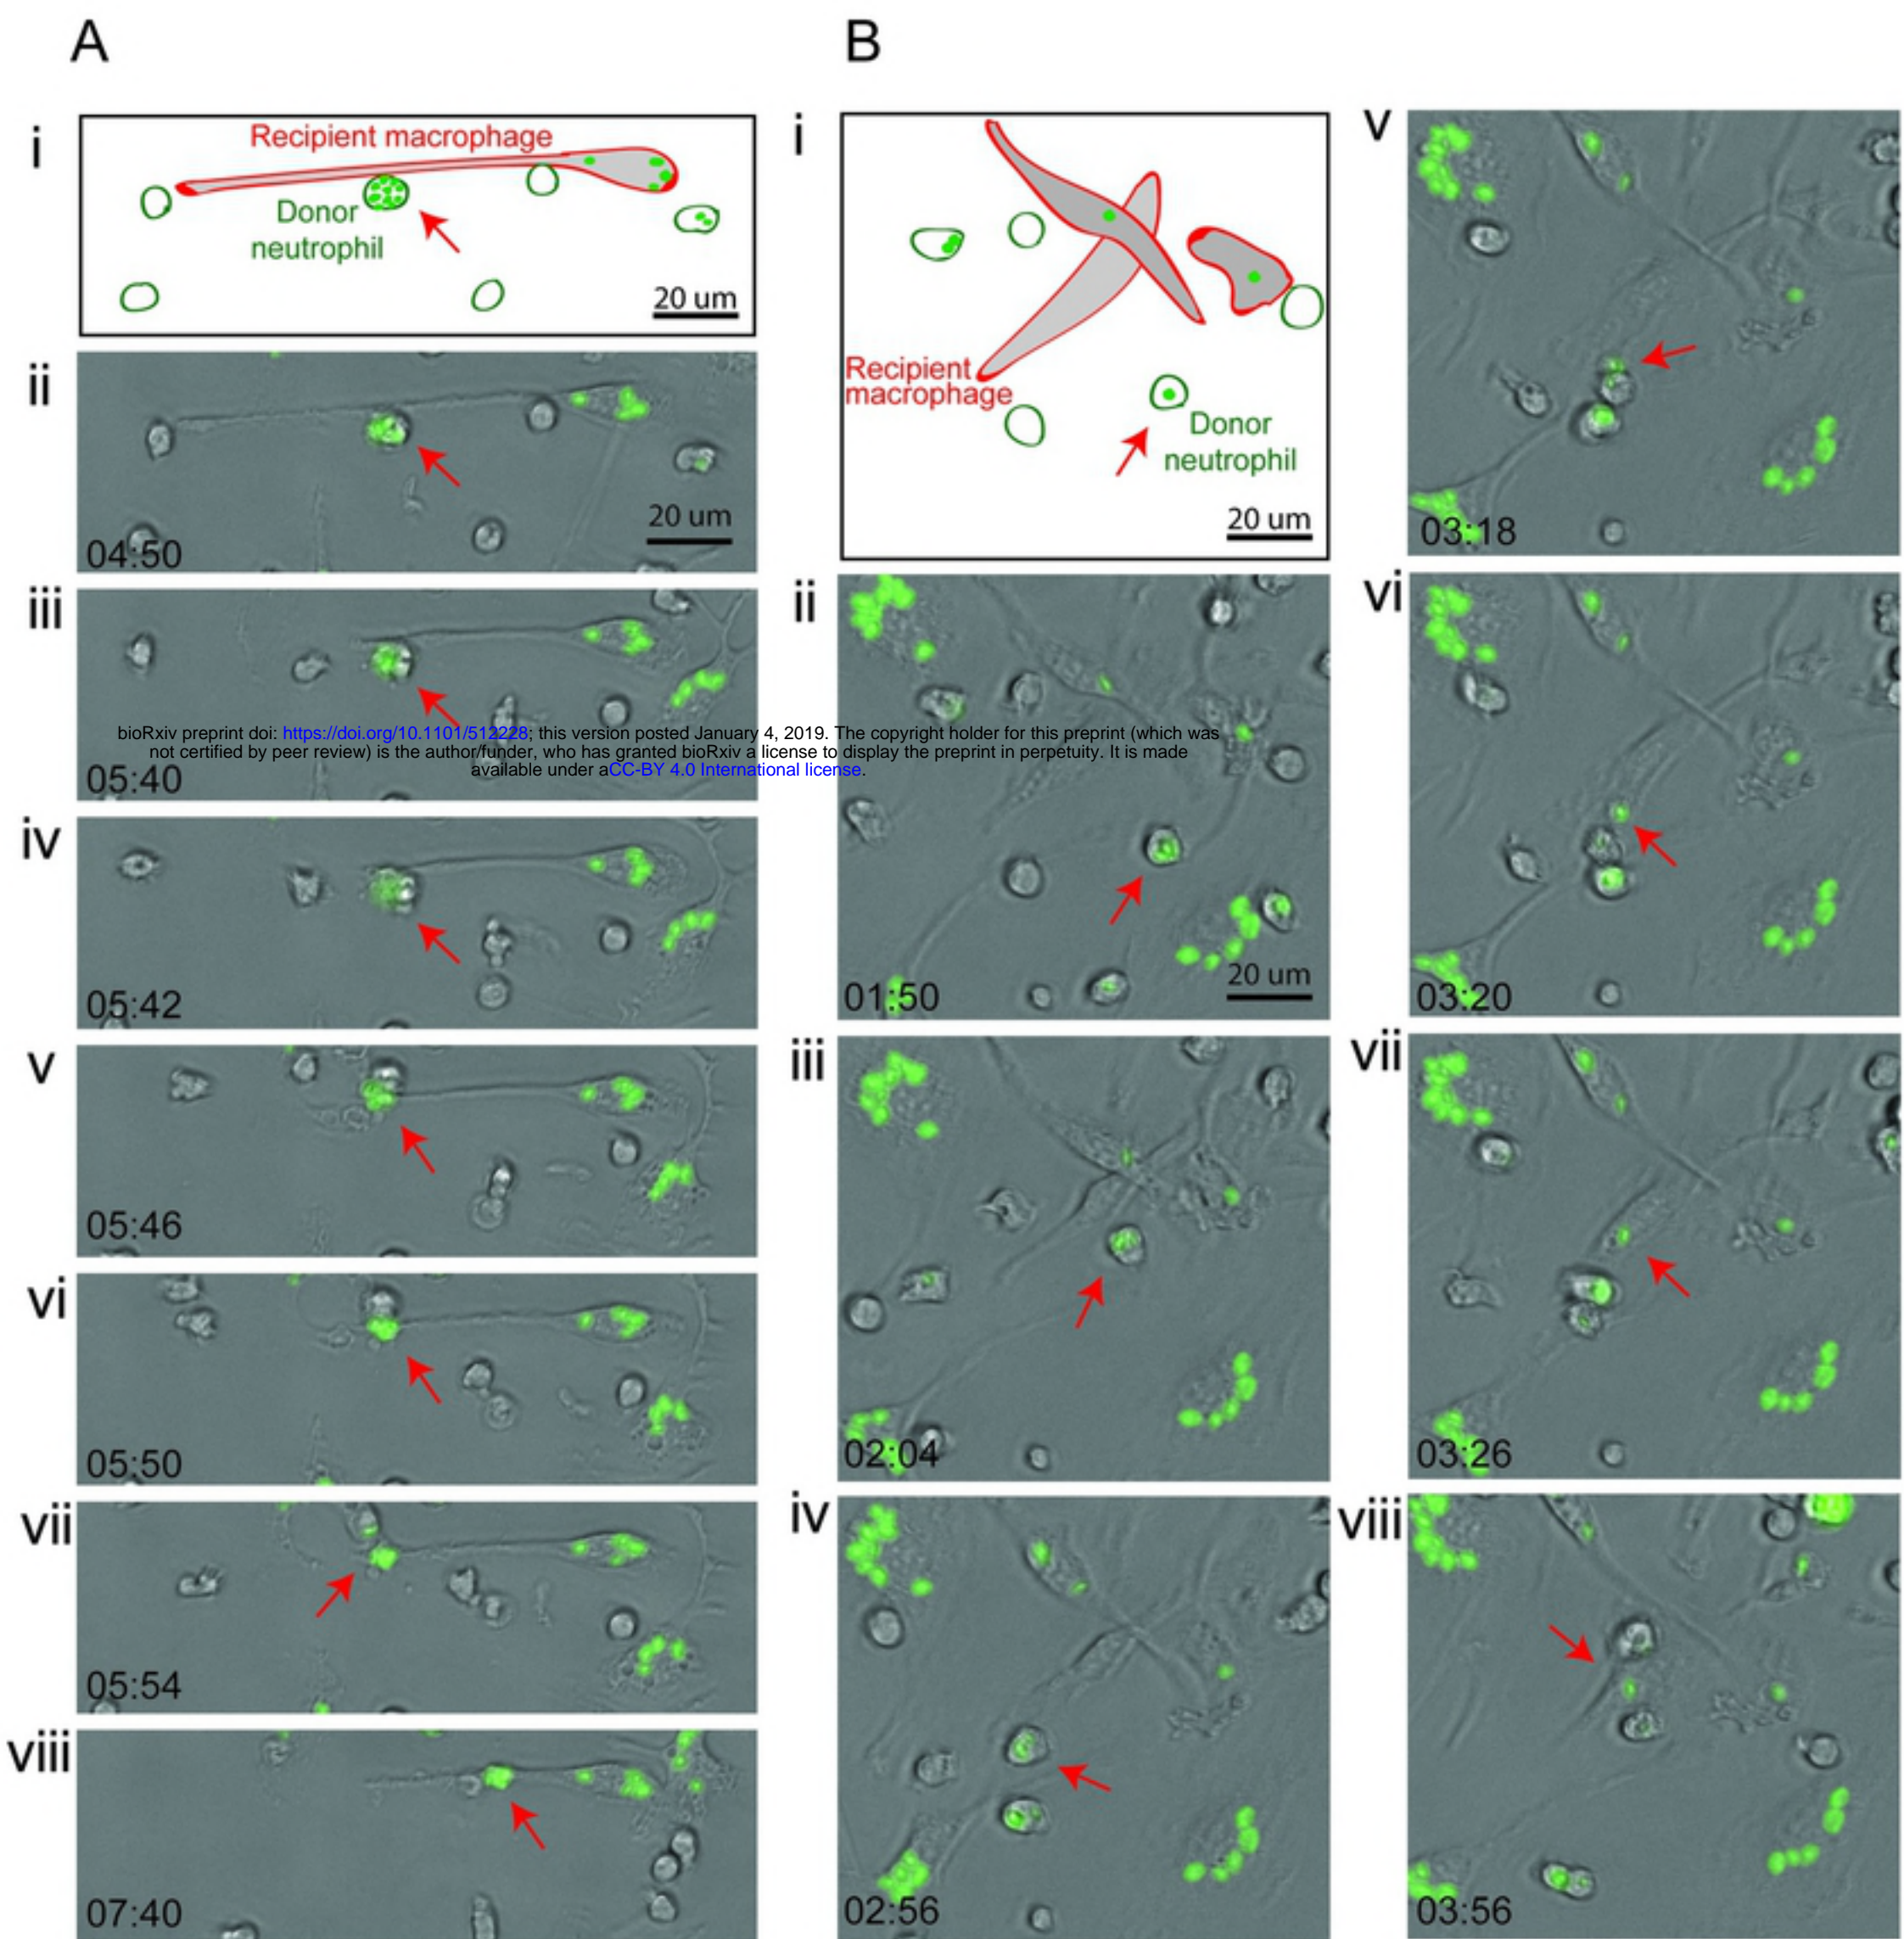

Figure 7

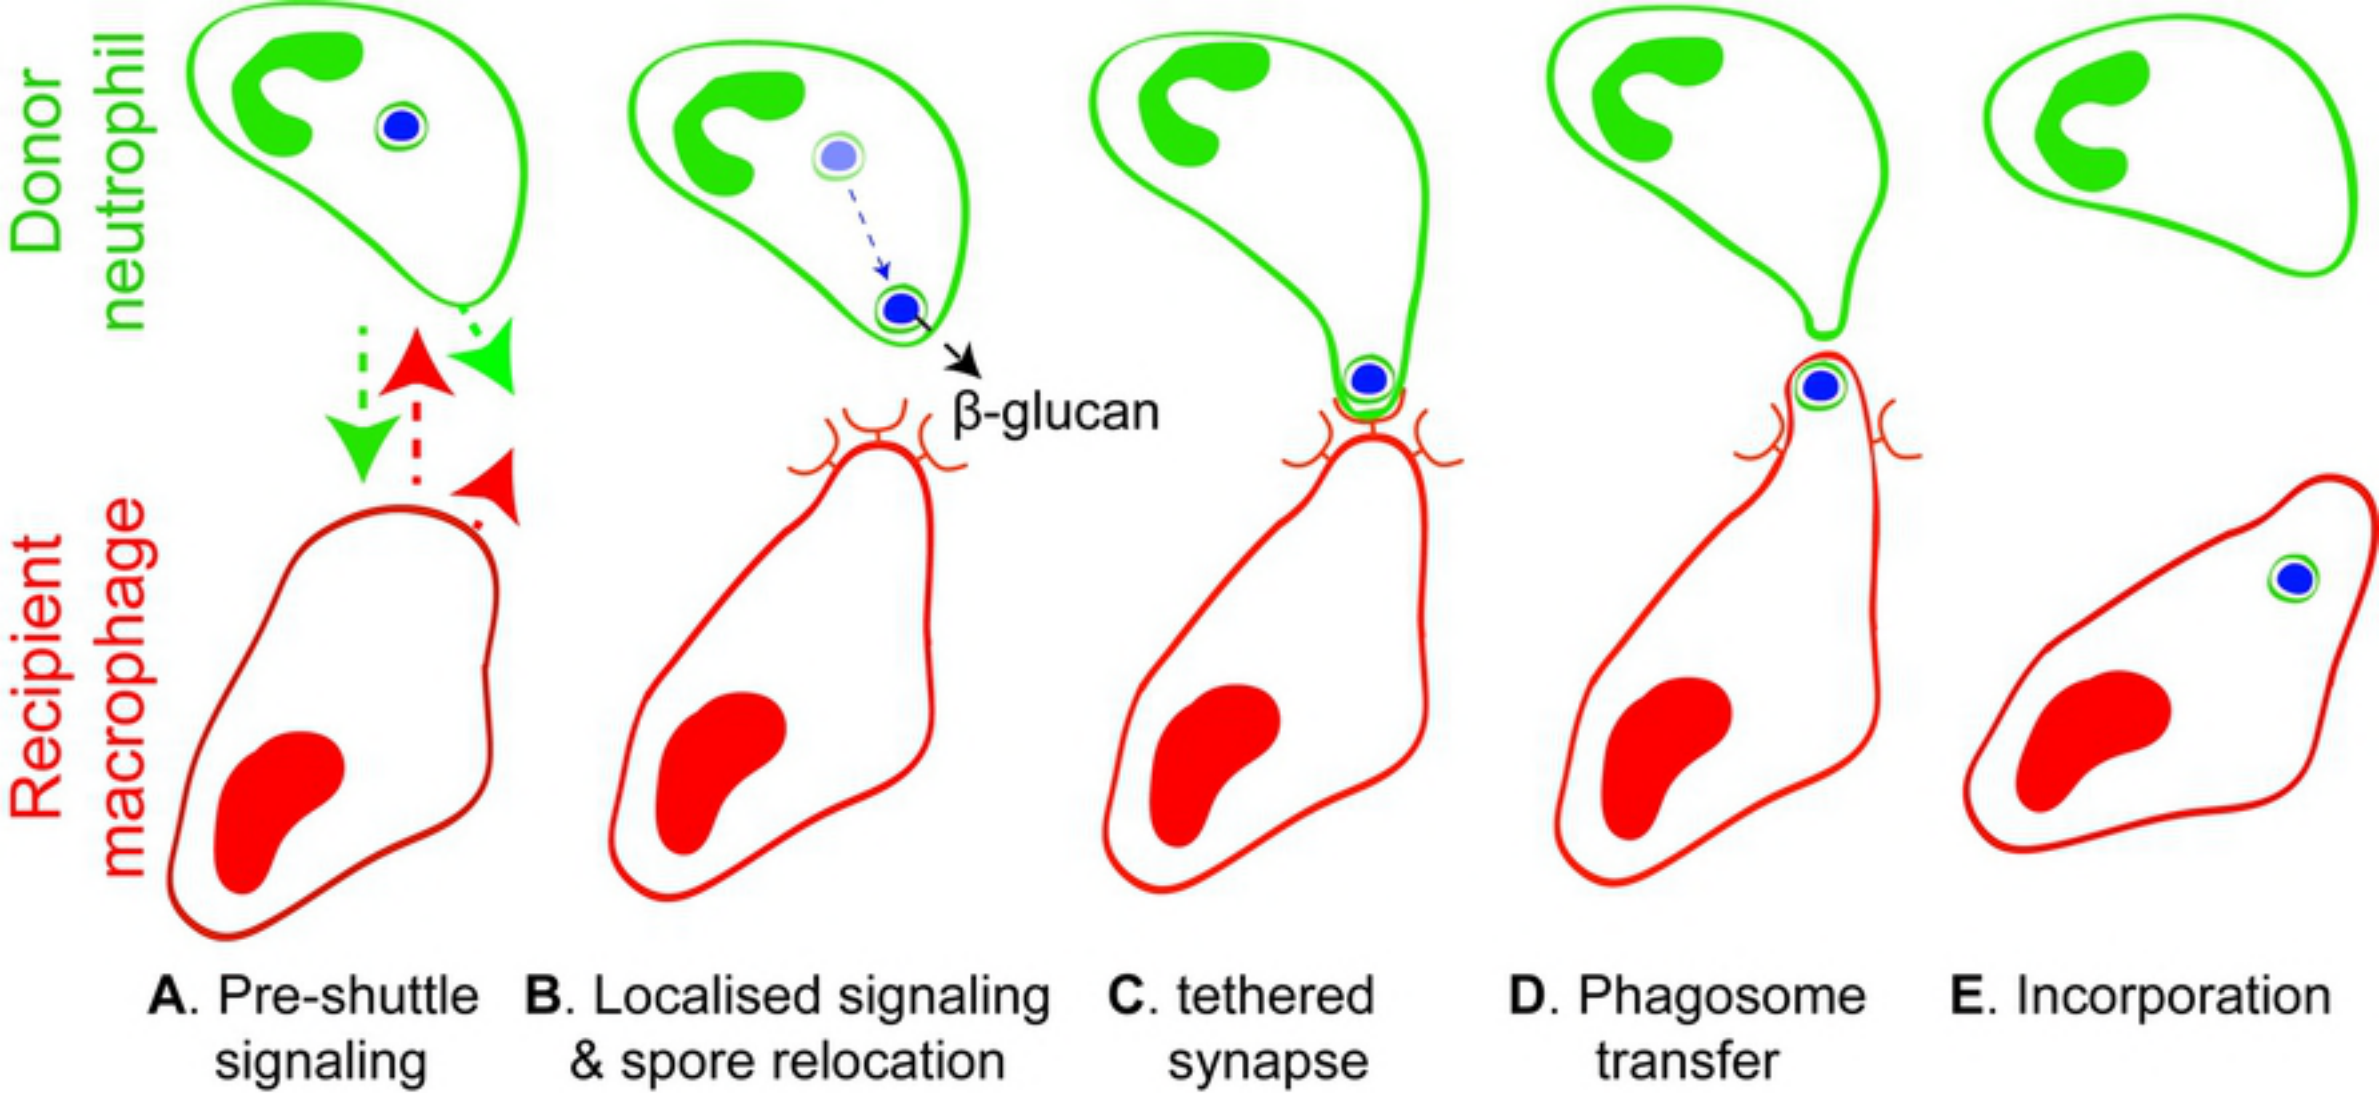

Figure 8
